# Supplementary material
Source: ML conference proceedings conference paper supplement (https://openreview.net/forum?id=w2vMTPxI6y)
Supplement: supplementary_material [file attachment]

## Sheet: connectivity table
Case	Mouse	Strain	Sex	Age (weeks)	Weight (grams)	Source area	Target area	Neurons	Total neurons	FLNe
1	13286	PVtdT	NA	9	22	A	ACAd	1781	187372	9.505e-03
1	13286	PVtdT	NA	9	22	ACAv	ACAd	31458	187372	1.679e-01
1	13286	PVtdT	NA	9	22	AId	ACAd	2027	187372	1.082e-02
1	13286	PVtdT	NA	9	22	AIp	ACAd	126	187372	6.725e-04
1	13286	PVtdT	NA	9	22	AIv	ACAd	263	187372	1.404e-03
1	13286	PVtdT	NA	9	22	AL	ACAd	1489	187372	7.947e-03
1	13286	PVtdT	NA	9	22	AM	ACAd	3764	187372	2.009e-02
1	13286	PVtdT	NA	9	22	AUDd	ACAd	727	187372	3.880e-03
1	13286	PVtdT	NA	9	22	AUDp	ACAd	588	187372	3.138e-03
1	13286	PVtdT	NA	9	22	AUDpo	ACAd	89	187372	4.750e-04
1	13286	PVtdT	NA	9	22	AUDv	ACAd	302	187372	1.612e-03
1	13286	PVtdT	NA	9	22	DP	ACAd	318	187372	1.697e-03
1	13286	PVtdT	NA	9	22	ECT	ACAd	188	187372	1.003e-03
1	13286	PVtdT	NA	9	22	FRP	ACAd	358	187372	1.911e-03
1	13286	PVtdT	NA	9	22	GU	ACAd	97	187372	5.177e-04
1	13286	PVtdT	NA	9	22	ILA	ACAd	2932	187372	1.565e-02
1	13286	PVtdT	NA	9	22	LI	ACAd	460	187372	2.455e-03
1	13286	PVtdT	NA	9	22	LLA	ACAd	302	187372	1.612e-03
1	13286	PVtdT	NA	9	22	LM	ACAd	1784	187372	9.521e-03
1	13286	PVtdT	NA	9	22	MM	ACAd	2678	187372	1.429e-02
1	13286	PVtdT	NA	9	22	MOp	ACAd	32019	187372	1.709e-01
1	13286	PVtdT	NA	9	22	MOs	ACAd	34864	187372	1.861e-01
1	13286	PVtdT	NA	9	22	ORBl	ACAd	5090	187372	2.717e-02
1	13286	PVtdT	NA	9	22	ORBm	ACAd	1755	187372	9.366e-03
1	13286	PVtdT	NA	9	22	P	ACAd	55	187372	2.935e-04
1	13286	PVtdT	NA	9	22	PERI	ACAd	19	187372	1.014e-04
1	13286	PVtdT	NA	9	22	PL	ACAd	4156	187372	2.218e-02
1	13286	PVtdT	NA	9	22	PM	ACAd	5070	187372	2.706e-02
1	13286	PVtdT	NA	9	22	POR	ACAd	189	187372	1.009e-03
1	13286	PVtdT	NA	9	22	PORa	ACAd	57	187372	3.042e-04
1	13286	PVtdT	NA	9	22	RL	ACAd	3470	187372	1.852e-02
1	13286	PVtdT	NA	9	22	RSPagl	ACAd	10249	187372	5.470e-02
1	13286	PVtdT	NA	9	22	RSPd	ACAd	10482	187372	5.594e-02
1	13286	PVtdT	NA	9	22	RSPv	ACAd	10093	187372	5.387e-02
1	13286	PVtdT	NA	9	22	SSp-bfd	ACAd	3526	187372	1.882e-02
1	13286	PVtdT	NA	9	22	SSp-lj	ACAd	17	187372	9.073e-05
1	13286	PVtdT	NA	9	22	SSp-ll	ACAd	1990	187372	1.062e-02
1	13286	PVtdT	NA	9	22	SSp-nm	ACAd	2	187372	1.067e-05
1	13286	PVtdT	NA	9	22	SSp-tr	ACAd	741	187372	3.955e-03
1	13286	PVtdT	NA	9	22	SSp-ul	ACAd	5298	187372	2.828e-02
1	13286	PVtdT	NA	9	22	SSp-un	ACAd	138	187372	7.365e-04
1	13286	PVtdT	NA	9	22	SSs	ACAd	1477	187372	7.883e-03
1	13286	PVtdT	NA	9	22	TEa	ACAd	561	187372	2.994e-03
1	13286	PVtdT	NA	9	22	TEp	ACAd	393	187372	2.097e-03
1	13286	PVtdT	NA	9	22	V1	ACAd	3041	187372	1.623e-02
1	13286	PVtdT	NA	9	22	VISC	ACAd	889	187372	4.745e-03
2	15048	PVtdT	NA	9	NA	A	AL	6834	297814	2.295e-02
2	15048	PVtdT	NA	9	NA	ACAd	AL	4275	297814	1.435e-02
2	15048	PVtdT	NA	9	NA	ACAv	AL	2653	297814	8.908e-03
2	15048	PVtdT	NA	9	NA	AId	AL	600	297814	2.015e-03
2	15048	PVtdT	NA	9	NA	AIp	AL	103	297814	3.459e-04
2	15048	PVtdT	NA	9	NA	AIv	AL	6	297814	2.015e-05
2	15048	PVtdT	NA	9	NA	AM	AL	4559	297814	1.531e-02
2	15048	PVtdT	NA	9	NA	AUDd	AL	8552	297814	2.872e-02
2	15048	PVtdT	NA	9	NA	AUDp	AL	5759	297814	1.934e-02
2	15048	PVtdT	NA	9	NA	AUDpo	AL	931	297814	3.126e-03
2	15048	PVtdT	NA	9	NA	AUDv	AL	805	297814	2.703e-03
2	15048	PVtdT	NA	9	NA	DP	AL	3672	297814	1.233e-02
2	15048	PVtdT	NA	9	NA	ECT	AL	1040	297814	3.492e-03
2	15048	PVtdT	NA	9	NA	FRP	AL	151	297814	5.070e-04
2	15048	PVtdT	NA	9	NA	GU	AL	11	297814	3.694e-05
2	15048	PVtdT	NA	9	NA	ILA	AL	257	297814	8.630e-04
2	15048	PVtdT	NA	9	NA	LI	AL	6880	297814	2.310e-02
2	15048	PVtdT	NA	9	NA	LLA	AL	9759	297814	3.277e-02
2	15048	PVtdT	NA	9	NA	LM	AL	25947	297814	8.712e-02
2	15048	PVtdT	NA	9	NA	MM	AL	541	297814	1.817e-03
2	15048	PVtdT	NA	9	NA	MOp	AL	1552	297814	5.211e-03
2	15048	PVtdT	NA	9	NA	MOs	AL	6309	297814	2.118e-02
2	15048	PVtdT	NA	9	NA	ORBl	AL	1007	297814	3.381e-03
2	15048	PVtdT	NA	9	NA	ORBm	AL	123	297814	4.130e-04
2	15048	PVtdT	NA	9	NA	P	AL	774	297814	2.599e-03
2	15048	PVtdT	NA	9	NA	PERI	AL	381	297814	1.279e-03
2	15048	PVtdT	NA	9	NA	PL	AL	357	297814	1.199e-03
2	15048	PVtdT	NA	9	NA	PM	AL	3692	297814	1.240e-02
2	15048	PVtdT	NA	9	NA	POR	AL	1215	297814	4.080e-03
2	15048	PVtdT	NA	9	NA	PORa	AL	67	297814	2.250e-04
2	15048	PVtdT	NA	9	NA	RL	AL	26620	297814	8.938e-02
2	15048	PVtdT	NA	9	NA	RSPagl	AL	1667	297814	5.597e-03
2	15048	PVtdT	NA	9	NA	RSPd	AL	2721	297814	9.137e-03
2	15048	PVtdT	NA	9	NA	RSPv	AL	1559	297814	5.235e-03
2	15048	PVtdT	NA	9	NA	SSp-bfd	AL	63754	297814	2.141e-01
2	15048	PVtdT	NA	9	NA	SSp-lj	AL	32	297814	1.074e-04
2	15048	PVtdT	NA	9	NA	SSp-ll	AL	185	297814	6.212e-04
2	15048	PVtdT	NA	9	NA	SSp-nm	AL	2	297814	6.716e-06
2	15048	PVtdT	NA	9	NA	SSp-tr	AL	2645	297814	8.881e-03
2	15048	PVtdT	NA	9	NA	SSp-ul	AL	174	297814	5.843e-04
2	15048	PVtdT	NA	9	NA	SSp-un	AL	1699	297814	5.705e-03
2	15048	PVtdT	NA	9	NA	SSs	AL	30006	297814	1.008e-01
2	15048	PVtdT	NA	9	NA	TEa	AL	839	297814	2.817e-03
2	15048	PVtdT	NA	9	NA	TEp	AL	1387	297814	4.657e-03
2	15048	PVtdT	NA	9	NA	V1	AL	63656	297814	2.137e-01
2	15048	PVtdT	NA	9	NA	VISC	AL	2056	297814	6.904e-03
3	13042	PVtdT	NA	28	NA	A	AM	30116	374010	8.052e-02
3	13042	PVtdT	NA	28	NA	ACAd	AM	9414	374010	2.517e-02
3	13042	PVtdT	NA	28	NA	ACAv	AM	12194	374010	3.260e-02
3	13042	PVtdT	NA	28	NA	AId	AM	1866	374010	4.989e-03
3	13042	PVtdT	NA	28	NA	AIp	AM	87	374010	2.326e-04
3	13042	PVtdT	NA	28	NA	AIv	AM	24	374010	6.417e-05
3	13042	PVtdT	NA	28	NA	AL	AM	4293	374010	1.148e-02
3	13042	PVtdT	NA	28	NA	AUDd	AM	6282	374010	1.680e-02
3	13042	PVtdT	NA	28	NA	AUDp	AM	4448	374010	1.189e-02
3	13042	PVtdT	NA	28	NA	AUDpo	AM	756	374010	2.021e-03
3	13042	PVtdT	NA	28	NA	AUDv	AM	1113	374010	2.976e-03
3	13042	PVtdT	NA	28	NA	DP	AM	3301	374010	8.826e-03
3	13042	PVtdT	NA	28	NA	ECT	AM	674	374010	1.802e-03
3	13042	PVtdT	NA	28	NA	FRP	AM	1291	374010	3.452e-03
3	13042	PVtdT	NA	28	NA	GU	AM	32	374010	8.556e-05
3	13042	PVtdT	NA	28	NA	ILA	AM	3204	374010	8.567e-03
3	13042	PVtdT	NA	28	NA	LI	AM	3261	374010	8.719e-03
3	13042	PVtdT	NA	28	NA	LLA	AM	5429	374010	1.452e-02
3	13042	PVtdT	NA	28	NA	LM	AM	7649	374010	2.045e-02
3	13042	PVtdT	NA	28	NA	MM	AM	33564	374010	8.974e-02
3	13042	PVtdT	NA	28	NA	MOp	AM	7303	374010	1.953e-02
3	13042	PVtdT	NA	28	NA	MOs	AM	9659	374010	2.583e-02
3	13042	PVtdT	NA	28	NA	ORBl	AM	1132	374010	3.027e-03
3	13042	PVtdT	NA	28	NA	ORBm	AM	3846	374010	1.028e-02
3	13042	PVtdT	NA	28	NA	P	AM	479	374010	1.281e-03
3	13042	PVtdT	NA	28	NA	PERI	AM	158	374010	4.224e-04
3	13042	PVtdT	NA	28	NA	PL	AM	2179	374010	5.826e-03
3	13042	PVtdT	NA	28	NA	PM	AM	30754	374010	8.223e-02
3	13042	PVtdT	NA	28	NA	POR	AM	1064	374010	2.845e-03
3	13042	PVtdT	NA	28	NA	PORa	AM	413	374010	1.104e-03
3	13042	PVtdT	NA	28	NA	RL	AM	5767	374010	1.542e-02
3	13042	PVtdT	NA	28	NA	RSPagl	AM	41341	374010	1.105e-01
3	13042	PVtdT	NA	28	NA	RSPd	AM	14702	374010	3.931e-02
3	13042	PVtdT	NA	28	NA	RSPv	AM	11906	374010	3.183e-02
3	13042	PVtdT	NA	28	NA	SSp-bfd	AM	8425	374010	2.253e-02
3	13042	PVtdT	NA	28	NA	SSp-lj	AM	16	374010	4.278e-05
3	13042	PVtdT	NA	28	NA	SSp-ll	AM	1012	374010	2.706e-03
3	13042	PVtdT	NA	28	NA	SSp-nm	AM	2	374010	5.347e-06
3	13042	PVtdT	NA	28	NA	SSp-tr	AM	43129	374010	1.153e-01
3	13042	PVtdT	NA	28	NA	SSp-ul	AM	116	374010	3.102e-04
3	13042	PVtdT	NA	28	NA	SSp-un	AM	513	374010	1.372e-03
3	13042	PVtdT	NA	28	NA	SSs	AM	9030	374010	2.414e-02
3	13042	PVtdT	NA	28	NA	TEa	AM	1212	374010	3.241e-03
3	13042	PVtdT	NA	28	NA	TEp	AM	3230	374010	8.636e-03
3	13042	PVtdT	NA	28	NA	V1	AM	44679	374010	1.195e-01
3	13042	PVtdT	NA	28	NA	VISC	AM	2945	374010	7.874e-03
4	13280	PVtdT	NA	8	20	A	AM	22200	367375	6.043e-02
4	13280	PVtdT	NA	8	20	ACAd	AM	8410	367375	2.289e-02
4	13280	PVtdT	NA	8	20	ACAv	AM	2500	367375	6.805e-03
4	13280	PVtdT	NA	8	20	AId	AM	1400	367375	3.811e-03
4	13280	PVtdT	NA	8	20	AIp	AM	69	367375	1.878e-04
4	13280	PVtdT	NA	8	20	AIv	AM	7	367375	1.905e-05
4	13280	PVtdT	NA	8	20	AL	AM	4897	367375	1.333e-02
4	13280	PVtdT	NA	8	20	AUDd	AM	8321	367375	2.265e-02
4	13280	PVtdT	NA	8	20	AUDp	AM	3811	367375	1.037e-02
4	13280	PVtdT	NA	8	20	AUDpo	AM	781	367375	2.126e-03
4	13280	PVtdT	NA	8	20	AUDv	AM	1218	367375	3.315e-03
4	13280	PVtdT	NA	8	20	DP	AM	2012	367375	5.477e-03
4	13280	PVtdT	NA	8	20	ECT	AM	351	367375	9.554e-04
4	13280	PVtdT	NA	8	20	FRP	AM	124	367375	3.375e-04
4	13280	PVtdT	NA	8	20	GU	AM	108	367375	2.940e-04
4	13280	PVtdT	NA	8	20	ILA	AM	725	367375	1.973e-03
4	13280	PVtdT	NA	8	20	LI	AM	2116	367375	5.760e-03
4	13280	PVtdT	NA	8	20	LLA	AM	4498	367375	1.224e-02
4	13280	PVtdT	NA	8	20	LM	AM	7966	367375	2.168e-02
4	13280	PVtdT	NA	8	20	MM	AM	37678	367375	1.026e-01
4	13280	PVtdT	NA	8	20	MOp	AM	11053	367375	3.009e-02
4	13280	PVtdT	NA	8	20	MOs	AM	10591	367375	2.883e-02
4	13280	PVtdT	NA	8	20	ORBl	AM	1801	367375	4.902e-03
4	13280	PVtdT	NA	8	20	ORBm	AM	1730	367375	4.709e-03
4	13280	PVtdT	NA	8	20	P	AM	660	367375	1.797e-03
4	13280	PVtdT	NA	8	20	PERI	AM	100	367375	2.722e-04
4	13280	PVtdT	NA	8	20	PL	AM	1444	367375	3.931e-03
4	13280	PVtdT	NA	8	20	PM	AM	35874	367375	9.765e-02
4	13280	PVtdT	NA	8	20	POR	AM	395	367375	1.075e-03
4	13280	PVtdT	NA	8	20	PORa	AM	175	367375	4.764e-04
4	13280	PVtdT	NA	8	20	RL	AM	11417	367375	3.108e-02
4	13280	PVtdT	NA	8	20	RSPagl	AM	28628	367375	7.793e-02
4	13280	PVtdT	NA	8	20	RSPd	AM	14023	367375	3.817e-02
4	13280	PVtdT	NA	8	20	RSPv	AM	4402	367375	1.198e-02
4	13280	PVtdT	NA	8	20	SSp-bfd	AM	19770	367375	5.381e-02
4	13280	PVtdT	NA	8	20	SSp-lj	AM	16	367375	4.355e-05
4	13280	PVtdT	NA	8	20	SSp-ll	AM	4500	367375	1.225e-02
4	13280	PVtdT	NA	8	20	SSp-nm	AM	9	367375	2.450e-05
4	13280	PVtdT	NA	8	20	SSp-tr	AM	56492	367375	1.538e-01
4	13280	PVtdT	NA	8	20	SSp-ul	AM	368	367375	1.002e-03
4	13280	PVtdT	NA	8	20	SSp-un	AM	1170	367375	3.185e-03
4	13280	PVtdT	NA	8	20	SSs	AM	10421	367375	2.837e-02
4	13280	PVtdT	NA	8	20	TEa	AM	1303	367375	3.547e-03
4	13280	PVtdT	NA	8	20	TEp	AM	1470	367375	4.001e-03
4	13280	PVtdT	NA	8	20	V1	AM	36863	367375	1.003e-01
4	13280	PVtdT	NA	8	20	VISC	AM	3508	367375	9.549e-03
5	13341	PVtdT	NA	8	20	A	AUDpo	557	191760	2.905e-03
5	13341	PVtdT	NA	8	20	ACAd	AUDpo	310	191760	1.617e-03
5	13341	PVtdT	NA	8	20	ACAv	AUDpo	164	191760	8.552e-04
5	13341	PVtdT	NA	8	20	AId	AUDpo	553	191760	2.884e-03
5	13341	PVtdT	NA	8	20	AIp	AUDpo	413	191760	2.154e-03
5	13341	PVtdT	NA	8	20	AIv	AUDpo	17	191760	8.865e-05
5	13341	PVtdT	NA	8	20	AL	AUDpo	356	191760	1.856e-03
5	13341	PVtdT	NA	8	20	AM	AUDpo	1017	191760	5.304e-03
5	13341	PVtdT	NA	8	20	AUDd	AUDpo	3850	191760	2.008e-02
5	13341	PVtdT	NA	8	20	AUDp	AUDpo	36780	191760	1.918e-01
5	13341	PVtdT	NA	8	20	AUDv	AUDpo	25348	191760	1.322e-01
5	13341	PVtdT	NA	8	20	DP	AUDpo	8112	191760	4.230e-02
5	13341	PVtdT	NA	8	20	ECT	AUDpo	17205	191760	8.972e-02
5	13341	PVtdT	NA	8	20	FRP	AUDpo	213	191760	1.111e-03
5	13341	PVtdT	NA	8	20	GU	AUDpo	106	191760	5.528e-04
5	13341	PVtdT	NA	8	20	ILA	AUDpo	168	191760	8.761e-04
5	13341	PVtdT	NA	8	20	LI	AUDpo	2752	191760	1.435e-02
5	13341	PVtdT	NA	8	20	LLA	AUDpo	746	191760	3.890e-03
5	13341	PVtdT	NA	8	20	LM	AUDpo	1714	191760	8.938e-03
5	13341	PVtdT	NA	8	20	MM	AUDpo	1214	191760	6.331e-03
5	13341	PVtdT	NA	8	20	MOp	AUDpo	905	191760	4.719e-03
5	13341	PVtdT	NA	8	20	MOs	AUDpo	467	191760	2.435e-03
5	13341	PVtdT	NA	8	20	ORBl	AUDpo	727	191760	3.791e-03
5	13341	PVtdT	NA	8	20	ORBm	AUDpo	34	191760	1.773e-04
5	13341	PVtdT	NA	8	20	P	AUDpo	1338	191760	6.977e-03
5	13341	PVtdT	NA	8	20	PERI	AUDpo	2616	191760	1.364e-02
5	13341	PVtdT	NA	8	20	PL	AUDpo	287	191760	1.497e-03
5	13341	PVtdT	NA	8	20	PM	AUDpo	774	191760	4.036e-03
5	13341	PVtdT	NA	8	20	POR	AUDpo	7855	191760	4.096e-02
5	13341	PVtdT	NA	8	20	PORa	AUDpo	6847	191760	3.571e-02
5	13341	PVtdT	NA	8	20	RL	AUDpo	199	191760	1.038e-03
5	13341	PVtdT	NA	8	20	RSPagl	AUDpo	148	191760	7.718e-04
5	13341	PVtdT	NA	8	20	RSPd	AUDpo	271	191760	1.413e-03
5	13341	PVtdT	NA	8	20	RSPv	AUDpo	107	191760	5.580e-04
5	13341	PVtdT	NA	8	20	SSp-bfd	AUDpo	818	191760	4.266e-03
5	13341	PVtdT	NA	8	20	SSp-lj	AUDpo	41	191760	2.138e-04
5	13341	PVtdT	NA	8	20	SSp-ll	AUDpo	503	191760	2.623e-03
5	13341	PVtdT	NA	8	20	SSp-nm	AUDpo	42	191760	2.190e-04
5	13341	PVtdT	NA	8	20	SSp-tr	AUDpo	1553	191760	8.099e-03
5	13341	PVtdT	NA	8	20	SSp-ul	AUDpo	86	191760	4.485e-04
5	13341	PVtdT	NA	8	20	SSp-un	AUDpo	160	191760	8.344e-04
5	13341	PVtdT	NA	8	20	SSs	AUDpo	1218	191760	6.352e-03
5	13341	PVtdT	NA	8	20	TEa	AUDpo	26797	191760	1.397e-01
5	13341	PVtdT	NA	8	20	TEp	AUDpo	32800	191760	1.710e-01
5	13341	PVtdT	NA	8	20	V1	AUDpo	1469	191760	7.661e-03
5	13341	PVtdT	NA	8	20	VISC	AUDpo	2103	191760	1.097e-02
6	12115	PVtdT	NA	30	NA	A	DP	7025	483659	1.452e-02
6	12115	PVtdT	NA	30	NA	ACAd	DP	2454	483659	5.074e-03
6	12115	PVtdT	NA	30	NA	ACAv	DP	496	483659	1.026e-03
6	12115	PVtdT	NA	30	NA	AId	DP	487	483659	1.007e-03
6	12115	PVtdT	NA	30	NA	AIp	DP	746	483659	1.542e-03
6	12115	PVtdT	NA	30	NA	AIv	DP	90	483659	1.861e-04
6	12115	PVtdT	NA	30	NA	AL	DP	14641	483659	3.027e-02
6	12115	PVtdT	NA	30	NA	AM	DP	8177	483659	1.691e-02
6	12115	PVtdT	NA	30	NA	AUDd	DP	22864	483659	4.727e-02
6	12115	PVtdT	NA	30	NA	AUDp	DP	44109	483659	9.120e-02
6	12115	PVtdT	NA	30	NA	AUDpo	DP	23611	483659	4.882e-02
6	12115	PVtdT	NA	30	NA	AUDv	DP	21057	483659	4.354e-02
6	12115	PVtdT	NA	30	NA	ECT	DP	9218	483659	1.906e-02
6	12115	PVtdT	NA	30	NA	FRP	DP	424	483659	8.767e-04
6	12115	PVtdT	NA	30	NA	GU	DP	104	483659	2.150e-04
6	12115	PVtdT	NA	30	NA	ILA	DP	315	483659	6.513e-04
6	12115	PVtdT	NA	30	NA	LI	DP	17373	483659	3.592e-02
6	12115	PVtdT	NA	30	NA	LLA	DP	7597	483659	1.571e-02
6	12115	PVtdT	NA	30	NA	LM	DP	43207	483659	8.933e-02
6	12115	PVtdT	NA	30	NA	MM	DP	6024	483659	1.246e-02
6	12115	PVtdT	NA	30	NA	MOp	DP	3092	483659	6.393e-03
6	12115	PVtdT	NA	30	NA	MOs	DP	3765	483659	7.784e-03
6	12115	PVtdT	NA	30	NA	ORBl	DP	809	483659	1.673e-03
6	12115	PVtdT	NA	30	NA	ORBm	DP	601	483659	1.243e-03
6	12115	PVtdT	NA	30	NA	P	DP	2789	483659	5.766e-03
6	12115	PVtdT	NA	30	NA	PERI	DP	3592	483659	7.427e-03
6	12115	PVtdT	NA	30	NA	PL	DP	592	483659	1.224e-03
6	12115	PVtdT	NA	30	NA	PM	DP	6306	483659	1.304e-02
6	12115	PVtdT	NA	30	NA	POR	DP	17781	483659	3.676e-02
6	12115	PVtdT	NA	30	NA	PORa	DP	6836	483659	1.413e-02
6	12115	PVtdT	NA	30	NA	RL	DP	11018	483659	2.278e-02
6	12115	PVtdT	NA	30	NA	RSPagl	DP	3686	483659	7.621e-03
6	12115	PVtdT	NA	30	NA	RSPd	DP	2425	483659	5.014e-03
6	12115	PVtdT	NA	30	NA	RSPv	DP	998	483659	2.063e-03
6	12115	PVtdT	NA	30	NA	SSp-bfd	DP	24818	483659	5.131e-02
6	12115	PVtdT	NA	30	NA	SSp-lj	DP	23	483659	4.755e-05
6	12115	PVtdT	NA	30	NA	SSp-ll	DP	2359	483659	4.877e-03
6	12115	PVtdT	NA	30	NA	SSp-nm	DP	12	483659	2.481e-05
6	12115	PVtdT	NA	30	NA	SSp-tr	DP	7503	483659	1.551e-02
6	12115	PVtdT	NA	30	NA	SSp-ul	DP	349	483659	7.216e-04
6	12115	PVtdT	NA	30	NA	SSp-un	DP	799	483659	1.652e-03
6	12115	PVtdT	NA	30	NA	SSs	DP	42071	483659	8.698e-02
6	12115	PVtdT	NA	30	NA	TEa	DP	16832	483659	3.480e-02
6	12115	PVtdT	NA	30	NA	TEp	DP	33280	483659	6.881e-02
6	12115	PVtdT	NA	30	NA	V1	DP	51527	483659	1.065e-01
6	12115	PVtdT	NA	30	NA	VISC	DP	9777	483659	2.021e-02
7	14005	PVtdT	NA	11	NA	A	GU	0	184679	0.000e+00
7	14005	PVtdT	NA	11	NA	ACAd	GU	72	184679	3.899e-04
7	14005	PVtdT	NA	11	NA	ACAv	GU	8	184679	4.332e-05
7	14005	PVtdT	NA	11	NA	AId	GU	32859	184679	1.779e-01
7	14005	PVtdT	NA	11	NA	AIp	GU	6284	184679	3.403e-02
7	14005	PVtdT	NA	11	NA	AIv	GU	18413	184679	9.970e-02
7	14005	PVtdT	NA	11	NA	AL	GU	0	184679	0.000e+00
7	14005	PVtdT	NA	11	NA	AM	GU	3	184679	1.624e-05
7	14005	PVtdT	NA	11	NA	AUDd	GU	87	184679	4.711e-04
7	14005	PVtdT	NA	11	NA	AUDp	GU	194	184679	1.050e-03
7	14005	PVtdT	NA	11	NA	AUDpo	GU	9	184679	4.873e-05
7	14005	PVtdT	NA	11	NA	AUDv	GU	225	184679	1.218e-03
7	14005	PVtdT	NA	11	NA	DP	GU	1	184679	5.415e-06
7	14005	PVtdT	NA	11	NA	ECT	GU	49	184679	2.653e-04
7	14005	PVtdT	NA	11	NA	FRP	GU	518	184679	2.805e-03
7	14005	PVtdT	NA	11	NA	ILA	GU	6	184679	3.249e-05
7	14005	PVtdT	NA	11	NA	LI	GU	1	184679	5.415e-06
7	14005	PVtdT	NA	11	NA	LLA	GU	1	184679	5.415e-06
7	14005	PVtdT	NA	11	NA	LM	GU	0	184679	0.000e+00
7	14005	PVtdT	NA	11	NA	MM	GU	1	184679	5.415e-06
7	14005	PVtdT	NA	11	NA	MOp	GU	12362	184679	6.694e-02
7	14005	PVtdT	NA	11	NA	MOs	GU	955	184679	5.171e-03
7	14005	PVtdT	NA	11	NA	ORBl	GU	4319	184679	2.339e-02
7	14005	PVtdT	NA	11	NA	ORBm	GU	193	184679	1.045e-03
7	14005	PVtdT	NA	11	NA	P	GU	0	184679	0.000e+00
7	14005	PVtdT	NA	11	NA	PERI	GU	30	184679	1.624e-04
7	14005	PVtdT	NA	11	NA	PL	GU	285	184679	1.543e-03
7	14005	PVtdT	NA	11	NA	PM	GU	1	184679	5.415e-06
7	14005	PVtdT	NA	11	NA	POR	GU	0	184679	0.000e+00
7	14005	PVtdT	NA	11	NA	PORa	GU	0	184679	0.000e+00
7	14005	PVtdT	NA	11	NA	RL	GU	0	184679	0.000e+00
7	14005	PVtdT	NA	11	NA	RSPagl	GU	2	184679	1.083e-05
7	14005	PVtdT	NA	11	NA	RSPd	GU	7	184679	3.790e-05
7	14005	PVtdT	NA	11	NA	RSPv	GU	0	184679	0.000e+00
7	14005	PVtdT	NA	11	NA	SSp-bfd	GU	4667	184679	2.527e-02
7	14005	PVtdT	NA	11	NA	SSp-lj	GU	5380	184679	2.913e-02
7	14005	PVtdT	NA	11	NA	SSp-ll	GU	24	184679	1.300e-04
7	14005	PVtdT	NA	11	NA	SSp-nm	GU	24851	184679	1.346e-01
7	14005	PVtdT	NA	11	NA	SSp-tr	GU	15	184679	8.122e-05
7	14005	PVtdT	NA	11	NA	SSp-ul	GU	573	184679	3.103e-03
7	14005	PVtdT	NA	11	NA	SSp-un	GU	78	184679	4.224e-04
7	14005	PVtdT	NA	11	NA	SSs	GU	52470	184679	2.841e-01
7	14005	PVtdT	NA	11	NA	TEa	GU	517	184679	2.799e-03
7	14005	PVtdT	NA	11	NA	TEp	GU	1	184679	5.415e-06
7	14005	PVtdT	NA	11	NA	V1	GU	2	184679	1.083e-05
7	14005	PVtdT	NA	11	NA	VISC	GU	19216	184679	1.041e-01
8	13049	PVtdT	NA	8	NA	A	LM	445	195644	2.275e-03
8	13049	PVtdT	NA	8	NA	ACAd	LM	479	195644	2.448e-03
8	13049	PVtdT	NA	8	NA	ACAv	LM	63	195644	3.220e-04
8	13049	PVtdT	NA	8	NA	AId	LM	179	195644	9.149e-04
8	13049	PVtdT	NA	8	NA	AIp	LM	8	195644	4.089e-05
8	13049	PVtdT	NA	8	NA	AIv	LM	41	195644	2.096e-04
8	13049	PVtdT	NA	8	NA	AL	LM	9340	195644	4.774e-02
8	13049	PVtdT	NA	8	NA	AM	LM	2576	195644	1.317e-02
8	13049	PVtdT	NA	8	NA	AUDd	LM	1072	195644	5.479e-03
8	13049	PVtdT	NA	8	NA	AUDp	LM	2183	195644	1.116e-02
8	13049	PVtdT	NA	8	NA	AUDpo	LM	871	195644	4.452e-03
8	13049	PVtdT	NA	8	NA	AUDv	LM	338	195644	1.728e-03
8	13049	PVtdT	NA	8	NA	DP	LM	5294	195644	2.706e-02
8	13049	PVtdT	NA	8	NA	ECT	LM	2693	195644	1.376e-02
8	13049	PVtdT	NA	8	NA	FRP	LM	21	195644	1.073e-04
8	13049	PVtdT	NA	8	NA	GU	LM	6	195644	3.067e-05
8	13049	PVtdT	NA	8	NA	ILA	LM	17	195644	8.689e-05
8	13049	PVtdT	NA	8	NA	LI	LM	13798	195644	7.053e-02
8	13049	PVtdT	NA	8	NA	LLA	LM	2850	195644	1.457e-02
8	13049	PVtdT	NA	8	NA	MM	LM	1733	195644	8.858e-03
8	13049	PVtdT	NA	8	NA	MOp	LM	207	195644	1.058e-03
8	13049	PVtdT	NA	8	NA	MOs	LM	868	195644	4.437e-03
8	13049	PVtdT	NA	8	NA	ORBl	LM	506	195644	2.586e-03
8	13049	PVtdT	NA	8	NA	ORBm	LM	310	195644	1.585e-03
8	13049	PVtdT	NA	8	NA	P	LM	10666	195644	5.452e-02
8	13049	PVtdT	NA	8	NA	PERI	LM	33	195644	1.687e-04
8	13049	PVtdT	NA	8	NA	PL	LM	25	195644	1.278e-04
8	13049	PVtdT	NA	8	NA	PM	LM	7712	195644	3.942e-02
8	13049	PVtdT	NA	8	NA	POR	LM	18932	195644	9.677e-02
8	13049	PVtdT	NA	8	NA	PORa	LM	2241	195644	1.145e-02
8	13049	PVtdT	NA	8	NA	RL	LM	2284	195644	1.167e-02
8	13049	PVtdT	NA	8	NA	RSPagl	LM	1357	195644	6.936e-03
8	13049	PVtdT	NA	8	NA	RSPd	LM	1700	195644	8.689e-03
8	13049	PVtdT	NA	8	NA	RSPv	LM	1360	195644	6.951e-03
8	13049	PVtdT	NA	8	NA	SSp-bfd	LM	819	195644	4.186e-03
8	13049	PVtdT	NA	8	NA	SSp-lj	LM	2	195644	1.022e-05
8	13049	PVtdT	NA	8	NA	SSp-ll	LM	13	195644	6.645e-05
8	13049	PVtdT	NA	8	NA	SSp-nm	LM	2	195644	1.022e-05
8	13049	PVtdT	NA	8	NA	SSp-tr	LM	81	195644	4.140e-04
8	13049	PVtdT	NA	8	NA	SSp-ul	LM	7	195644	3.578e-05
8	13049	PVtdT	NA	8	NA	SSp-un	LM	10	195644	5.111e-05
8	13049	PVtdT	NA	8	NA	SSs	LM	496	195644	2.535e-03
8	13049	PVtdT	NA	8	NA	TEa	LM	453	195644	2.315e-03
8	13049	PVtdT	NA	8	NA	TEp	LM	8543	195644	4.367e-02
8	13049	PVtdT	NA	8	NA	V1	LM	92840	195644	4.745e-01
8	13049	PVtdT	NA	8	NA	VISC	LM	170	195644	8.689e-04
9	13053	PVtdT	NA	8	NA	A	LM	270	83951	3.216e-03
9	13053	PVtdT	NA	8	NA	ACAd	LM	34	83951	4.050e-04
9	13053	PVtdT	NA	8	NA	ACAv	LM	87	83951	1.036e-03
9	13053	PVtdT	NA	8	NA	AId	LM	14	83951	1.668e-04
9	13053	PVtdT	NA	8	NA	AIp	LM	4	83951	4.765e-05
9	13053	PVtdT	NA	8	NA	AIv	LM	34	83951	4.050e-04
9	13053	PVtdT	NA	8	NA	AL	LM	1005	83951	1.197e-02
9	13053	PVtdT	NA	8	NA	AM	LM	2049	83951	2.441e-02
9	13053	PVtdT	NA	8	NA	AUDd	LM	109	83951	1.298e-03
9	13053	PVtdT	NA	8	NA	AUDp	LM	502	83951	5.980e-03
9	13053	PVtdT	NA	8	NA	AUDpo	LM	185	83951	2.204e-03
9	13053	PVtdT	NA	8	NA	AUDv	LM	168	83951	2.001e-03
9	13053	PVtdT	NA	8	NA	DP	LM	645	83951	7.683e-03
9	13053	PVtdT	NA	8	NA	ECT	LM	324	83951	3.859e-03
9	13053	PVtdT	NA	8	NA	FRP	LM	0	83951	0.000e+00
9	13053	PVtdT	NA	8	NA	GU	LM	0	83951	0.000e+00
9	13053	PVtdT	NA	8	NA	ILA	LM	1	83951	1.191e-05
9	13053	PVtdT	NA	8	NA	LI	LM	13418	83951	1.598e-01
9	13053	PVtdT	NA	8	NA	LLA	LM	498	83951	5.932e-03
9	13053	PVtdT	NA	8	NA	MM	LM	829	83951	9.875e-03
9	13053	PVtdT	NA	8	NA	MOp	LM	4	83951	4.765e-05
9	13053	PVtdT	NA	8	NA	MOs	LM	8	83951	9.529e-05
9	13053	PVtdT	NA	8	NA	ORBl	LM	31	83951	3.693e-04
9	13053	PVtdT	NA	8	NA	ORBm	LM	1	83951	1.191e-05
9	13053	PVtdT	NA	8	NA	P	LM	2535	83951	3.020e-02
9	13053	PVtdT	NA	8	NA	PERI	LM	29	83951	3.454e-04
9	13053	PVtdT	NA	8	NA	PL	LM	0	83951	0.000e+00
9	13053	PVtdT	NA	8	NA	PM	LM	2646	83951	3.152e-02
9	13053	PVtdT	NA	8	NA	POR	LM	8741	83951	1.041e-01
9	13053	PVtdT	NA	8	NA	PORa	LM	902	83951	1.074e-02
9	13053	PVtdT	NA	8	NA	RL	LM	284	83951	3.383e-03
9	13053	PVtdT	NA	8	NA	RSPagl	LM	325	83951	3.871e-03
9	13053	PVtdT	NA	8	NA	RSPd	LM	716	83951	8.529e-03
9	13053	PVtdT	NA	8	NA	RSPv	LM	298	83951	3.550e-03
9	13053	PVtdT	NA	8	NA	SSp-bfd	LM	294	83951	3.502e-03
9	13053	PVtdT	NA	8	NA	SSp-lj	LM	3	83951	3.574e-05
9	13053	PVtdT	NA	8	NA	SSp-ll	LM	2	83951	2.382e-05
9	13053	PVtdT	NA	8	NA	SSp-nm	LM	0	83951	0.000e+00
9	13053	PVtdT	NA	8	NA	SSp-tr	LM	26	83951	3.097e-04
9	13053	PVtdT	NA	8	NA	SSp-ul	LM	0	83951	0.000e+00
9	13053	PVtdT	NA	8	NA	SSp-un	LM	0	83951	0.000e+00
9	13053	PVtdT	NA	8	NA	SSs	LM	93	83951	1.108e-03
9	13053	PVtdT	NA	8	NA	TEa	LM	330	83951	3.931e-03
9	13053	PVtdT	NA	8	NA	TEp	LM	4045	83951	4.818e-02
9	13053	PVtdT	NA	8	NA	V1	LM	42393	83951	5.050e-01
9	13053	PVtdT	NA	8	NA	VISC	LM	69	83951	8.219e-04
10	14269	PVtdT	NA	8	NA	A	LM	3020	305021	9.901e-03
10	14269	PVtdT	NA	8	NA	ACAd	LM	1936	305021	6.347e-03
10	14269	PVtdT	NA	8	NA	ACAv	LM	1734	305021	5.685e-03
10	14269	PVtdT	NA	8	NA	AId	LM	193	305021	6.327e-04
10	14269	PVtdT	NA	8	NA	AIp	LM	233	305021	7.639e-04
10	14269	PVtdT	NA	8	NA	AIv	LM	65	305021	2.131e-04
10	14269	PVtdT	NA	8	NA	AL	LM	14113	305021	4.627e-02
10	14269	PVtdT	NA	8	NA	AM	LM	7200	305021	2.360e-02
10	14269	PVtdT	NA	8	NA	AUDd	LM	3321	305021	1.089e-02
10	14269	PVtdT	NA	8	NA	AUDp	LM	6071	305021	1.990e-02
10	14269	PVtdT	NA	8	NA	AUDpo	LM	2804	305021	9.193e-03
10	14269	PVtdT	NA	8	NA	AUDv	LM	2037	305021	6.678e-03
10	14269	PVtdT	NA	8	NA	DP	LM	10257	305021	3.363e-02
10	14269	PVtdT	NA	8	NA	ECT	LM	5029	305021	1.649e-02
10	14269	PVtdT	NA	8	NA	FRP	LM	68	305021	2.229e-04
10	14269	PVtdT	NA	8	NA	GU	LM	2	305021	6.557e-06
10	14269	PVtdT	NA	8	NA	ILA	LM	50	305021	1.639e-04
10	14269	PVtdT	NA	8	NA	LI	LM	16332	305021	5.354e-02
10	14269	PVtdT	NA	8	NA	LLA	LM	4415	305021	1.447e-02
10	14269	PVtdT	NA	8	NA	MM	LM	2747	305021	9.006e-03
10	14269	PVtdT	NA	8	NA	MOp	LM	530	305021	1.738e-03
10	14269	PVtdT	NA	8	NA	MOs	LM	1461	305021	4.790e-03
10	14269	PVtdT	NA	8	NA	ORBl	LM	322	305021	1.056e-03
10	14269	PVtdT	NA	8	NA	ORBm	LM	309	305021	1.013e-03
10	14269	PVtdT	NA	8	NA	P	LM	4653	305021	1.525e-02
10	14269	PVtdT	NA	8	NA	PERI	LM	486	305021	1.593e-03
10	14269	PVtdT	NA	8	NA	PL	LM	190	305021	6.229e-04
10	14269	PVtdT	NA	8	NA	PM	LM	9893	305021	3.243e-02
10	14269	PVtdT	NA	8	NA	POR	LM	10992	305021	3.604e-02
10	14269	PVtdT	NA	8	NA	PORa	LM	2779	305021	9.111e-03
10	14269	PVtdT	NA	8	NA	RL	LM	11175	305021	3.664e-02
10	14269	PVtdT	NA	8	NA	RSPagl	LM	3293	305021	1.080e-02
10	14269	PVtdT	NA	8	NA	RSPd	LM	4561	305021	1.495e-02
10	14269	PVtdT	NA	8	NA	RSPv	LM	1174	305021	3.849e-03
10	14269	PVtdT	NA	8	NA	SSp-bfd	LM	6385	305021	2.093e-02
10	14269	PVtdT	NA	8	NA	SSp-lj	LM	0	305021	0.000e+00
10	14269	PVtdT	NA	8	NA	SSp-ll	LM	54	305021	1.770e-04
10	14269	PVtdT	NA	8	NA	SSp-nm	LM	2	305021	6.557e-06
10	14269	PVtdT	NA	8	NA	SSp-tr	LM	466	305021	1.528e-03
10	14269	PVtdT	NA	8	NA	SSp-ul	LM	10	305021	3.278e-05
10	14269	PVtdT	NA	8	NA	SSp-un	LM	15	305021	4.918e-05
10	14269	PVtdT	NA	8	NA	SSs	LM	4377	305021	1.435e-02
10	14269	PVtdT	NA	8	NA	TEa	LM	2846	305021	9.331e-03
10	14269	PVtdT	NA	8	NA	TEp	LM	16303	305021	5.345e-02
10	14269	PVtdT	NA	8	NA	V1	LM	140378	305021	4.602e-01
10	14269	PVtdT	NA	8	NA	VISC	LM	740	305021	2.426e-03
11	13051	PVtdT	NA	9	NA	A	MM	161	193287	8.330e-04
11	13051	PVtdT	NA	9	NA	ACAd	MM	311	193287	1.609e-03
11	13051	PVtdT	NA	9	NA	ACAv	MM	1567	193287	8.107e-03
11	13051	PVtdT	NA	9	NA	AId	MM	538	193287	2.783e-03
11	13051	PVtdT	NA	9	NA	AIp	MM	86	193287	4.449e-04
11	13051	PVtdT	NA	9	NA	AIv	MM	9	193287	4.656e-05
11	13051	PVtdT	NA	9	NA	AL	MM	518	193287	2.680e-03
11	13051	PVtdT	NA	9	NA	AM	MM	7158	193287	3.703e-02
11	13051	PVtdT	NA	9	NA	AUDd	MM	528	193287	2.732e-03
11	13051	PVtdT	NA	9	NA	AUDp	MM	1286	193287	6.653e-03
11	13051	PVtdT	NA	9	NA	AUDpo	MM	1085	193287	5.613e-03
11	13051	PVtdT	NA	9	NA	AUDv	MM	486	193287	2.514e-03
11	13051	PVtdT	NA	9	NA	DP	MM	685	193287	3.544e-03
11	13051	PVtdT	NA	9	NA	ECT	MM	1202	193287	6.219e-03
11	13051	PVtdT	NA	9	NA	FRP	MM	150	193287	7.760e-04
11	13051	PVtdT	NA	9	NA	GU	MM	99	193287	5.122e-04
11	13051	PVtdT	NA	9	NA	ILA	MM	1138	193287	5.888e-03
11	13051	PVtdT	NA	9	NA	LI	MM	1131	193287	5.851e-03
11	13051	PVtdT	NA	9	NA	LLA	MM	806	193287	4.170e-03
11	13051	PVtdT	NA	9	NA	LM	MM	4681	193287	2.422e-02
11	13051	PVtdT	NA	9	NA	MOp	MM	85	193287	4.398e-04
11	13051	PVtdT	NA	9	NA	MOs	MM	118	193287	6.105e-04
11	13051	PVtdT	NA	9	NA	ORBl	MM	2207	193287	1.142e-02
11	13051	PVtdT	NA	9	NA	ORBm	MM	1249	193287	6.462e-03
11	13051	PVtdT	NA	9	NA	P	MM	1954	193287	1.011e-02
11	13051	PVtdT	NA	9	NA	PERI	MM	111	193287	5.743e-04
11	13051	PVtdT	NA	9	NA	PL	MM	85	193287	4.398e-04
11	13051	PVtdT	NA	9	NA	PM	MM	34270	193287	1.773e-01
11	13051	PVtdT	NA	9	NA	POR	MM	1184	193287	6.126e-03
11	13051	PVtdT	NA	9	NA	PORa	MM	531	193287	2.747e-03
11	13051	PVtdT	NA	9	NA	RL	MM	212	193287	1.097e-03
11	13051	PVtdT	NA	9	NA	RSPagl	MM	37202	193287	1.925e-01
11	13051	PVtdT	NA	9	NA	RSPd	MM	21899	193287	1.133e-01
11	13051	PVtdT	NA	9	NA	RSPv	MM	13050	193287	6.752e-02
11	13051	PVtdT	NA	9	NA	SSp-bfd	MM	40	193287	2.069e-04
11	13051	PVtdT	NA	9	NA	SSp-lj	MM	1	193287	5.174e-06
11	13051	PVtdT	NA	9	NA	SSp-ll	MM	12	193287	6.208e-05
11	13051	PVtdT	NA	9	NA	SSp-nm	MM	1	193287	5.174e-06
11	13051	PVtdT	NA	9	NA	SSp-tr	MM	92	193287	4.760e-04
11	13051	PVtdT	NA	9	NA	SSp-ul	MM	4	193287	2.069e-05
11	13051	PVtdT	NA	9	NA	SSp-un	MM	5	193287	2.587e-05
11	13051	PVtdT	NA	9	NA	SSs	MM	113	193287	5.846e-04
11	13051	PVtdT	NA	9	NA	TEa	MM	907	193287	4.693e-03
11	13051	PVtdT	NA	9	NA	TEp	MM	2223	193287	1.150e-02
11	13051	PVtdT	NA	9	NA	V1	MM	51944	193287	2.687e-01
11	13051	PVtdT	NA	9	NA	VISC	MM	163	193287	8.433e-04
12	12116	PVtdT	NA	30	NA	A	MOp	13	121296	1.072e-04
12	12116	PVtdT	NA	30	NA	ACAd	MOp	556	121296	4.584e-03
12	12116	PVtdT	NA	30	NA	ACAv	MOp	199	121296	1.641e-03
12	12116	PVtdT	NA	30	NA	AId	MOp	1665	121296	1.373e-02
12	12116	PVtdT	NA	30	NA	AIp	MOp	570	121296	4.699e-03
12	12116	PVtdT	NA	30	NA	AIv	MOp	29	121296	2.391e-04
12	12116	PVtdT	NA	30	NA	AL	MOp	0	121296	0.000e+00
12	12116	PVtdT	NA	30	NA	AM	MOp	2	121296	1.649e-05
12	12116	PVtdT	NA	30	NA	AUDd	MOp	202	121296	1.665e-03
12	12116	PVtdT	NA	30	NA	AUDp	MOp	190	121296	1.566e-03
12	12116	PVtdT	NA	30	NA	AUDpo	MOp	0	121296	0.000e+00
12	12116	PVtdT	NA	30	NA	AUDv	MOp	13	121296	1.072e-04
12	12116	PVtdT	NA	30	NA	DP	MOp	1	121296	8.244e-06
12	12116	PVtdT	NA	30	NA	ECT	MOp	5	121296	4.122e-05
12	12116	PVtdT	NA	30	NA	FRP	MOp	1768	121296	1.458e-02
12	12116	PVtdT	NA	30	NA	GU	MOp	674	121296	5.557e-03
12	12116	PVtdT	NA	30	NA	ILA	MOp	82	121296	6.760e-04
12	12116	PVtdT	NA	30	NA	LI	MOp	0	121296	0.000e+00
12	12116	PVtdT	NA	30	NA	LLA	MOp	0	121296	0.000e+00
12	12116	PVtdT	NA	30	NA	LM	MOp	1	121296	8.244e-06
12	12116	PVtdT	NA	30	NA	MM	MOp	1	121296	8.244e-06
12	12116	PVtdT	NA	30	NA	MOs	MOp	12204	121296	1.006e-01
12	12116	PVtdT	NA	30	NA	ORBl	MOp	1565	121296	1.290e-02
12	12116	PVtdT	NA	30	NA	ORBm	MOp	848	121296	6.991e-03
12	12116	PVtdT	NA	30	NA	P	MOp	1	121296	8.244e-06
12	12116	PVtdT	NA	30	NA	PERI	MOp	20	121296	1.649e-04
12	12116	PVtdT	NA	30	NA	PL	MOp	730	121296	6.018e-03
12	12116	PVtdT	NA	30	NA	PM	MOp	0	121296	0.000e+00
12	12116	PVtdT	NA	30	NA	POR	MOp	1	121296	8.244e-06
12	12116	PVtdT	NA	30	NA	PORa	MOp	0	121296	0.000e+00
12	12116	PVtdT	NA	30	NA	RL	MOp	44	121296	3.627e-04
12	12116	PVtdT	NA	30	NA	RSPagl	MOp	51	121296	4.205e-04
12	12116	PVtdT	NA	30	NA	RSPd	MOp	139	121296	1.146e-03
12	12116	PVtdT	NA	30	NA	RSPv	MOp	23	121296	1.896e-04
12	12116	PVtdT	NA	30	NA	SSp-bfd	MOp	29065	121296	2.396e-01
12	12116	PVtdT	NA	30	NA	SSp-lj	MOp	6580	121296	5.425e-02
12	12116	PVtdT	NA	30	NA	SSp-ll	MOp	2637	121296	2.174e-02
12	12116	PVtdT	NA	30	NA	SSp-nm	MOp	184	121296	1.517e-03
12	12116	PVtdT	NA	30	NA	SSp-tr	MOp	121	121296	9.976e-04
12	12116	PVtdT	NA	30	NA	SSp-ul	MOp	33308	121296	2.746e-01
12	12116	PVtdT	NA	30	NA	SSp-un	MOp	10457	121296	8.621e-02
12	12116	PVtdT	NA	30	NA	SSs	MOp	14989	121296	1.236e-01
12	12116	PVtdT	NA	30	NA	TEa	MOp	16	121296	1.319e-04
12	12116	PVtdT	NA	30	NA	TEp	MOp	2	121296	1.649e-05
12	12116	PVtdT	NA	30	NA	V1	MOp	10	121296	8.244e-05
12	12116	PVtdT	NA	30	NA	VISC	MOp	2330	121296	1.921e-02
13	13278	PVtdT	NA	12	25	A	P	178	185304	9.606e-04
13	13278	PVtdT	NA	12	25	ACAd	P	363	185304	1.959e-03
13	13278	PVtdT	NA	12	25	ACAv	P	221	185304	1.193e-03
13	13278	PVtdT	NA	12	25	AId	P	503	185304	2.714e-03
13	13278	PVtdT	NA	12	25	AIp	P	551	185304	2.973e-03
13	13278	PVtdT	NA	12	25	AIv	P	34	185304	1.835e-04
13	13278	PVtdT	NA	12	25	AL	P	4254	185304	2.296e-02
13	13278	PVtdT	NA	12	25	AM	P	2335	185304	1.260e-02
13	13278	PVtdT	NA	12	25	AUDd	P	407	185304	2.196e-03
13	13278	PVtdT	NA	12	25	AUDp	P	1296	185304	6.994e-03
13	13278	PVtdT	NA	12	25	AUDpo	P	2057	185304	1.110e-02
13	13278	PVtdT	NA	12	25	AUDv	P	1291	185304	6.967e-03
13	13278	PVtdT	NA	12	25	DP	P	793	185304	4.279e-03
13	13278	PVtdT	NA	12	25	ECT	P	11328	185304	6.113e-02
13	13278	PVtdT	NA	12	25	FRP	P	112	185304	6.044e-04
13	13278	PVtdT	NA	12	25	GU	P	14	185304	7.555e-05
13	13278	PVtdT	NA	12	25	ILA	P	96	185304	5.181e-04
13	13278	PVtdT	NA	12	25	LI	P	8617	185304	4.650e-02
13	13278	PVtdT	NA	12	25	LLA	P	1023	185304	5.521e-03
13	13278	PVtdT	NA	12	25	LM	P	18666	185304	1.007e-01
13	13278	PVtdT	NA	12	25	MM	P	4038	185304	2.179e-02
13	13278	PVtdT	NA	12	25	MOp	P	123	185304	6.638e-04
13	13278	PVtdT	NA	12	25	MOs	P	276	185304	1.489e-03
13	13278	PVtdT	NA	12	25	ORBl	P	712	185304	3.842e-03
13	13278	PVtdT	NA	12	25	ORBm	P	35	185304	1.889e-04
13	13278	PVtdT	NA	12	25	PERI	P	265	185304	1.430e-03
13	13278	PVtdT	NA	12	25	PL	P	28	185304	1.511e-04
13	13278	PVtdT	NA	12	25	PM	P	5815	185304	3.138e-02
13	13278	PVtdT	NA	12	25	POR	P	18363	185304	9.910e-02
13	13278	PVtdT	NA	12	25	PORa	P	4671	185304	2.521e-02
13	13278	PVtdT	NA	12	25	RL	P	658	185304	3.551e-03
13	13278	PVtdT	NA	12	25	RSPagl	P	1551	185304	8.370e-03
13	13278	PVtdT	NA	12	25	RSPd	P	5196	185304	2.804e-02
13	13278	PVtdT	NA	12	25	RSPv	P	1886	185304	1.018e-02
13	13278	PVtdT	NA	12	25	SSp-bfd	P	104	185304	5.612e-04
13	13278	PVtdT	NA	12	25	SSp-lj	P	2	185304	1.079e-05
13	13278	PVtdT	NA	12	25	SSp-ll	P	12	185304	6.476e-05
13	13278	PVtdT	NA	12	25	SSp-nm	P	0	185304	0.000e+00
13	13278	PVtdT	NA	12	25	SSp-tr	P	72	185304	3.886e-04
13	13278	PVtdT	NA	12	25	SSp-ul	P	3	185304	1.619e-05
13	13278	PVtdT	NA	12	25	SSp-un	P	2	185304	1.079e-05
13	13278	PVtdT	NA	12	25	SSs	P	336	185304	1.813e-03
13	13278	PVtdT	NA	12	25	TEa	P	3189	185304	1.721e-02
13	13278	PVtdT	NA	12	25	TEp	P	6495	185304	3.505e-02
13	13278	PVtdT	NA	12	25	V1	P	76697	185304	4.139e-01
13	13278	PVtdT	NA	12	25	VISC	P	636	185304	3.432e-03
14	13047	PVtdT	NA	8	NA	A	PL	371	120685	3.074e-03
14	13047	PVtdT	NA	8	NA	ACAd	PL	18274	120685	1.514e-01
14	13047	PVtdT	NA	8	NA	ACAv	PL	6498	120685	5.384e-02
14	13047	PVtdT	NA	8	NA	AId	PL	4779	120685	3.960e-02
14	13047	PVtdT	NA	8	NA	AIp	PL	629	120685	5.212e-03
14	13047	PVtdT	NA	8	NA	AIv	PL	313	120685	2.594e-03
14	13047	PVtdT	NA	8	NA	AL	PL	29	120685	2.403e-04
14	13047	PVtdT	NA	8	NA	AM	PL	516	120685	4.276e-03
14	13047	PVtdT	NA	8	NA	AUDd	PL	211	120685	1.748e-03
14	13047	PVtdT	NA	8	NA	AUDp	PL	103	120685	8.535e-04
14	13047	PVtdT	NA	8	NA	AUDpo	PL	9	120685	7.457e-05
14	13047	PVtdT	NA	8	NA	AUDv	PL	68	120685	5.635e-04
14	13047	PVtdT	NA	8	NA	DP	PL	17	120685	1.409e-04
14	13047	PVtdT	NA	8	NA	ECT	PL	102	120685	8.452e-04
14	13047	PVtdT	NA	8	NA	FRP	PL	7479	120685	6.197e-02
14	13047	PVtdT	NA	8	NA	GU	PL	1376	120685	1.140e-02
14	13047	PVtdT	NA	8	NA	ILA	PL	7799	120685	6.462e-02
14	13047	PVtdT	NA	8	NA	LI	PL	17	120685	1.409e-04
14	13047	PVtdT	NA	8	NA	LLA	PL	24	120685	1.989e-04
14	13047	PVtdT	NA	8	NA	LM	PL	7	120685	5.800e-05
14	13047	PVtdT	NA	8	NA	MM	PL	677	120685	5.610e-03
14	13047	PVtdT	NA	8	NA	MOp	PL	10861	120685	8.999e-02
14	13047	PVtdT	NA	8	NA	MOs	PL	34820	120685	2.885e-01
14	13047	PVtdT	NA	8	NA	ORBl	PL	2075	120685	1.719e-02
14	13047	PVtdT	NA	8	NA	ORBm	PL	2748	120685	2.277e-02
14	13047	PVtdT	NA	8	NA	P	PL	2	120685	1.657e-05
14	13047	PVtdT	NA	8	NA	PERI	PL	64	120685	5.303e-04
14	13047	PVtdT	NA	8	NA	PM	PL	84	120685	6.960e-04
14	13047	PVtdT	NA	8	NA	POR	PL	12	120685	9.943e-05
14	13047	PVtdT	NA	8	NA	PORa	PL	8	120685	6.629e-05
14	13047	PVtdT	NA	8	NA	RL	PL	89	120685	7.375e-04
14	13047	PVtdT	NA	8	NA	RSPagl	PL	837	120685	6.935e-03
14	13047	PVtdT	NA	8	NA	RSPd	PL	289	120685	2.395e-03
14	13047	PVtdT	NA	8	NA	RSPv	PL	83	120685	6.877e-04
14	13047	PVtdT	NA	8	NA	SSp-bfd	PL	1850	120685	1.533e-02
14	13047	PVtdT	NA	8	NA	SSp-lj	PL	371	120685	3.074e-03
14	13047	PVtdT	NA	8	NA	SSp-ll	PL	1403	120685	1.163e-02
14	13047	PVtdT	NA	8	NA	SSp-nm	PL	35	120685	2.900e-04
14	13047	PVtdT	NA	8	NA	SSp-tr	PL	1544	120685	1.279e-02
14	13047	PVtdT	NA	8	NA	SSp-ul	PL	2182	120685	1.808e-02
14	13047	PVtdT	NA	8	NA	SSp-un	PL	1070	120685	8.866e-03
14	13047	PVtdT	NA	8	NA	SSs	PL	5323	120685	4.411e-02
14	13047	PVtdT	NA	8	NA	TEa	PL	493	120685	4.085e-03
14	13047	PVtdT	NA	8	NA	TEp	PL	68	120685	5.635e-04
14	13047	PVtdT	NA	8	NA	V1	PL	40	120685	3.314e-04
14	13047	PVtdT	NA	8	NA	VISC	PL	5036	120685	4.173e-02
15	14054	PVtdT	NA	10	NA	A	PM	3509	303129	1.158e-02
15	14054	PVtdT	NA	10	NA	ACAd	PM	4863	303129	1.604e-02
15	14054	PVtdT	NA	10	NA	ACAv	PM	5910	303129	1.950e-02
15	14054	PVtdT	NA	10	NA	AId	PM	618	303129	2.039e-03
15	14054	PVtdT	NA	10	NA	AIp	PM	69	303129	2.276e-04
15	14054	PVtdT	NA	10	NA	AIv	PM	7	303129	2.309e-05
15	14054	PVtdT	NA	10	NA	AL	PM	2407	303129	7.941e-03
15	14054	PVtdT	NA	10	NA	AM	PM	31671	303129	1.045e-01
15	14054	PVtdT	NA	10	NA	AUDd	PM	465	303129	1.534e-03
15	14054	PVtdT	NA	10	NA	AUDp	PM	2621	303129	8.646e-03
15	14054	PVtdT	NA	10	NA	AUDpo	PM	973	303129	3.210e-03
15	14054	PVtdT	NA	10	NA	AUDv	PM	731	303129	2.412e-03
15	14054	PVtdT	NA	10	NA	DP	PM	3543	303129	1.169e-02
15	14054	PVtdT	NA	10	NA	ECT	PM	936	303129	3.088e-03
15	14054	PVtdT	NA	10	NA	FRP	PM	62	303129	2.045e-04
15	14054	PVtdT	NA	10	NA	GU	PM	2	303129	6.598e-06
15	14054	PVtdT	NA	10	NA	ILA	PM	1809	303129	5.968e-03
15	14054	PVtdT	NA	10	NA	LI	PM	5944	303129	1.961e-02
15	14054	PVtdT	NA	10	NA	LLA	PM	707	303129	2.332e-03
15	14054	PVtdT	NA	10	NA	LM	PM	15816	303129	5.218e-02
15	14054	PVtdT	NA	10	NA	MM	PM	32814	303129	1.083e-01
15	14054	PVtdT	NA	10	NA	MOp	PM	151	303129	4.981e-04
15	14054	PVtdT	NA	10	NA	MOs	PM	2005	303129	6.614e-03
15	14054	PVtdT	NA	10	NA	ORBl	PM	2176	303129	7.178e-03
15	14054	PVtdT	NA	10	NA	ORBm	PM	1284	303129	4.236e-03
15	14054	PVtdT	NA	10	NA	P	PM	2687	303129	8.864e-03
15	14054	PVtdT	NA	10	NA	PERI	PM	68	303129	2.243e-04
15	14054	PVtdT	NA	10	NA	PL	PM	424	303129	1.399e-03
15	14054	PVtdT	NA	10	NA	POR	PM	2566	303129	8.465e-03
15	14054	PVtdT	NA	10	NA	PORa	PM	821	303129	2.708e-03
15	14054	PVtdT	NA	10	NA	RL	PM	1428	303129	4.711e-03
15	14054	PVtdT	NA	10	NA	RSPagl	PM	26056	303129	8.596e-02
15	14054	PVtdT	NA	10	NA	RSPd	PM	22385	303129	7.385e-02
15	14054	PVtdT	NA	10	NA	RSPv	PM	12863	303129	4.243e-02
15	14054	PVtdT	NA	10	NA	SSp-bfd	PM	445	303129	1.468e-03
15	14054	PVtdT	NA	10	NA	SSp-lj	PM	0	303129	0.000e+00
15	14054	PVtdT	NA	10	NA	SSp-ll	PM	11	303129	3.629e-05
15	14054	PVtdT	NA	10	NA	SSp-nm	PM	0	303129	0.000e+00
15	14054	PVtdT	NA	10	NA	SSp-tr	PM	62	303129	2.045e-04
15	14054	PVtdT	NA	10	NA	SSp-ul	PM	3	303129	9.897e-06
15	14054	PVtdT	NA	10	NA	SSp-un	PM	7	303129	2.309e-05
15	14054	PVtdT	NA	10	NA	SSs	PM	406	303129	1.339e-03
15	14054	PVtdT	NA	10	NA	TEa	PM	1549	303129	5.110e-03
15	14054	PVtdT	NA	10	NA	TEp	PM	3873	303129	1.278e-02
15	14054	PVtdT	NA	10	NA	V1	PM	105466	303129	3.479e-01
15	14054	PVtdT	NA	10	NA	VISC	PM	916	303129	3.022e-03
16	11147	PVtdT	NA	16	NA	A	RL	12664	268089	4.724e-02
16	11147	PVtdT	NA	16	NA	ACAd	RL	2437	268089	9.090e-03
16	11147	PVtdT	NA	16	NA	ACAv	RL	110	268089	4.103e-04
16	11147	PVtdT	NA	16	NA	AId	RL	513	268089	1.914e-03
16	11147	PVtdT	NA	16	NA	AIp	RL	285	268089	1.063e-03
16	11147	PVtdT	NA	16	NA	AIv	RL	84	268089	3.133e-04
16	11147	PVtdT	NA	16	NA	AL	RL	12577	268089	4.691e-02
16	11147	PVtdT	NA	16	NA	AM	RL	4002	268089	1.493e-02
16	11147	PVtdT	NA	16	NA	AUDd	RL	8063	268089	3.008e-02
16	11147	PVtdT	NA	16	NA	AUDp	RL	4942	268089	1.843e-02
16	11147	PVtdT	NA	16	NA	AUDpo	RL	524	268089	1.955e-03
16	11147	PVtdT	NA	16	NA	AUDv	RL	1079	268089	4.025e-03
16	11147	PVtdT	NA	16	NA	DP	RL	2997	268089	1.118e-02
16	11147	PVtdT	NA	16	NA	ECT	RL	1168	268089	4.357e-03
16	11147	PVtdT	NA	16	NA	FRP	RL	117	268089	4.364e-04
16	11147	PVtdT	NA	16	NA	GU	RL	27	268089	1.007e-04
16	11147	PVtdT	NA	16	NA	ILA	RL	10	268089	3.730e-05
16	11147	PVtdT	NA	16	NA	LI	RL	4153	268089	1.549e-02
16	11147	PVtdT	NA	16	NA	LLA	RL	2883	268089	1.075e-02
16	11147	PVtdT	NA	16	NA	LM	RL	8503	268089	3.172e-02
16	11147	PVtdT	NA	16	NA	MM	RL	329	268089	1.227e-03
16	11147	PVtdT	NA	16	NA	MOp	RL	11260	268089	4.200e-02
16	11147	PVtdT	NA	16	NA	MOs	RL	7028	268089	2.622e-02
16	11147	PVtdT	NA	16	NA	ORBl	RL	728	268089	2.716e-03
16	11147	PVtdT	NA	16	NA	ORBm	RL	127	268089	4.737e-04
16	11147	PVtdT	NA	16	NA	P	RL	86	268089	3.208e-04
16	11147	PVtdT	NA	16	NA	PERI	RL	227	268089	8.467e-04
16	11147	PVtdT	NA	16	NA	PL	RL	206	268089	7.684e-04
16	11147	PVtdT	NA	16	NA	PM	RL	3434	268089	1.281e-02
16	11147	PVtdT	NA	16	NA	POR	RL	141	268089	5.259e-04
16	11147	PVtdT	NA	16	NA	PORa	RL	70	268089	2.611e-04
16	11147	PVtdT	NA	16	NA	RSPagl	RL	1365	268089	5.092e-03
16	11147	PVtdT	NA	16	NA	RSPd	RL	1990	268089	7.423e-03
16	11147	PVtdT	NA	16	NA	RSPv	RL	2020	268089	7.535e-03
16	11147	PVtdT	NA	16	NA	SSp-bfd	RL	76633	268089	2.858e-01
16	11147	PVtdT	NA	16	NA	SSp-lj	RL	22	268089	8.206e-05
16	11147	PVtdT	NA	16	NA	SSp-ll	RL	1692	268089	6.311e-03
16	11147	PVtdT	NA	16	NA	SSp-nm	RL	5	268089	1.865e-05
16	11147	PVtdT	NA	16	NA	SSp-tr	RL	10575	268089	3.945e-02
16	11147	PVtdT	NA	16	NA	SSp-ul	RL	883	268089	3.294e-03
16	11147	PVtdT	NA	16	NA	SSp-un	RL	5765	268089	2.150e-02
16	11147	PVtdT	NA	16	NA	SSs	RL	28092	268089	1.048e-01
16	11147	PVtdT	NA	16	NA	TEa	RL	1260	268089	4.700e-03
16	11147	PVtdT	NA	16	NA	TEp	RL	1810	268089	6.751e-03
16	11147	PVtdT	NA	16	NA	V1	RL	40845	268089	1.524e-01
16	11147	PVtdT	NA	16	NA	VISC	RL	4358	268089	1.626e-02
17	13271	PVtdT	NA	14	30	A	RL	4220	117830	3.581e-02
17	13271	PVtdT	NA	14	30	ACAd	RL	207	117830	1.757e-03
17	13271	PVtdT	NA	14	30	ACAv	RL	28	117830	2.376e-04
17	13271	PVtdT	NA	14	30	AId	RL	10	117830	8.487e-05
17	13271	PVtdT	NA	14	30	AIp	RL	27	117830	2.291e-04
17	13271	PVtdT	NA	14	30	AIv	RL	0	117830	0.000e+00
17	13271	PVtdT	NA	14	30	AL	RL	12074	117830	1.025e-01
17	13271	PVtdT	NA	14	30	AM	RL	327	117830	2.775e-03
17	13271	PVtdT	NA	14	30	AUDd	RL	1903	117830	1.615e-02
17	13271	PVtdT	NA	14	30	AUDp	RL	1605	117830	1.362e-02
17	13271	PVtdT	NA	14	30	AUDpo	RL	154	117830	1.307e-03
17	13271	PVtdT	NA	14	30	AUDv	RL	240	117830	2.037e-03
17	13271	PVtdT	NA	14	30	DP	RL	890	117830	7.553e-03
17	13271	PVtdT	NA	14	30	ECT	RL	117	117830	9.930e-04
17	13271	PVtdT	NA	14	30	FRP	RL	57	117830	4.837e-04
17	13271	PVtdT	NA	14	30	GU	RL	0	117830	0.000e+00
17	13271	PVtdT	NA	14	30	ILA	RL	13	117830	1.103e-04
17	13271	PVtdT	NA	14	30	LI	RL	1496	117830	1.270e-02
17	13271	PVtdT	NA	14	30	LLA	RL	3234	117830	2.745e-02
17	13271	PVtdT	NA	14	30	LM	RL	8194	117830	6.954e-02
17	13271	PVtdT	NA	14	30	MM	RL	18	117830	1.528e-04
17	13271	PVtdT	NA	14	30	MOp	RL	1156	117830	9.811e-03
17	13271	PVtdT	NA	14	30	MOs	RL	961	117830	8.156e-03
17	13271	PVtdT	NA	14	30	ORBl	RL	17	117830	1.443e-04
17	13271	PVtdT	NA	14	30	ORBm	RL	1	117830	8.487e-06
17	13271	PVtdT	NA	14	30	P	RL	21	117830	1.782e-04
17	13271	PVtdT	NA	14	30	PERI	RL	43	117830	3.649e-04
17	13271	PVtdT	NA	14	30	PL	RL	13	117830	1.103e-04
17	13271	PVtdT	NA	14	30	PM	RL	323	117830	2.741e-03
17	13271	PVtdT	NA	14	30	POR	RL	76	117830	6.450e-04
17	13271	PVtdT	NA	14	30	PORa	RL	13	117830	1.103e-04
17	13271	PVtdT	NA	14	30	RSPagl	RL	99	117830	8.402e-04
17	13271	PVtdT	NA	14	30	RSPd	RL	333	117830	2.826e-03
17	13271	PVtdT	NA	14	30	RSPv	RL	84	117830	7.129e-04
17	13271	PVtdT	NA	14	30	SSp-bfd	RL	37822	117830	3.210e-01
17	13271	PVtdT	NA	14	30	SSp-lj	RL	3	117830	2.546e-05
17	13271	PVtdT	NA	14	30	SSp-ll	RL	10	117830	8.487e-05
17	13271	PVtdT	NA	14	30	SSp-nm	RL	1	117830	8.487e-06
17	13271	PVtdT	NA	14	30	SSp-tr	RL	1288	117830	1.093e-02
17	13271	PVtdT	NA	14	30	SSp-ul	RL	10	117830	8.487e-05
17	13271	PVtdT	NA	14	30	SSp-un	RL	79	117830	6.705e-04
17	13271	PVtdT	NA	14	30	SSs	RL	11727	117830	9.952e-02
17	13271	PVtdT	NA	14	30	TEa	RL	53	117830	4.498e-04
17	13271	PVtdT	NA	14	30	TEp	RL	380	117830	3.225e-03
17	13271	PVtdT	NA	14	30	V1	RL	28061	117830	2.381e-01
17	13271	PVtdT	NA	14	30	VISC	RL	442	117830	3.751e-03
18	13281	PVtdT	NA	15	25	A	RSPd	113	111899	1.010e-03
18	13281	PVtdT	NA	15	25	ACAd	RSPd	4124	111899	3.685e-02
18	13281	PVtdT	NA	15	25	ACAv	RSPd	2839	111899	2.537e-02
18	13281	PVtdT	NA	15	25	AId	RSPd	721	111899	6.443e-03
18	13281	PVtdT	NA	15	25	AIp	RSPd	9	111899	8.043e-05
18	13281	PVtdT	NA	15	25	AIv	RSPd	6	111899	5.362e-05
18	13281	PVtdT	NA	15	25	AL	RSPd	369	111899	3.298e-03
18	13281	PVtdT	NA	15	25	AM	RSPd	1922	111899	1.718e-02
18	13281	PVtdT	NA	15	25	AUDd	RSPd	26	111899	2.324e-04
18	13281	PVtdT	NA	15	25	AUDp	RSPd	37	111899	3.307e-04
18	13281	PVtdT	NA	15	25	AUDpo	RSPd	23	111899	2.055e-04
18	13281	PVtdT	NA	15	25	AUDv	RSPd	7	111899	6.256e-05
18	13281	PVtdT	NA	15	25	DP	RSPd	91	111899	8.132e-04
18	13281	PVtdT	NA	15	25	ECT	RSPd	71	111899	6.345e-04
18	13281	PVtdT	NA	15	25	FRP	RSPd	0	111899	0.000e+00
18	13281	PVtdT	NA	15	25	GU	RSPd	14	111899	1.251e-04
18	13281	PVtdT	NA	15	25	ILA	RSPd	53	111899	4.736e-04
18	13281	PVtdT	NA	15	25	LI	RSPd	173	111899	1.546e-03
18	13281	PVtdT	NA	15	25	LLA	RSPd	65	111899	5.809e-04
18	13281	PVtdT	NA	15	25	LM	RSPd	1433	111899	1.281e-02
18	13281	PVtdT	NA	15	25	MM	RSPd	6516	111899	5.823e-02
18	13281	PVtdT	NA	15	25	MOp	RSPd	91	111899	8.132e-04
18	13281	PVtdT	NA	15	25	MOs	RSPd	819	111899	7.319e-03
18	13281	PVtdT	NA	15	25	ORBl	RSPd	141	111899	1.260e-03
18	13281	PVtdT	NA	15	25	ORBm	RSPd	179	111899	1.600e-03
18	13281	PVtdT	NA	15	25	P	RSPd	153	111899	1.367e-03
18	13281	PVtdT	NA	15	25	PERI	RSPd	11	111899	9.830e-05
18	13281	PVtdT	NA	15	25	PL	RSPd	151	111899	1.349e-03
18	13281	PVtdT	NA	15	25	PM	RSPd	4365	111899	3.901e-02
18	13281	PVtdT	NA	15	25	POR	RSPd	89	111899	7.954e-04
18	13281	PVtdT	NA	15	25	PORa	RSPd	9	111899	8.043e-05
18	13281	PVtdT	NA	15	25	RL	RSPd	158	111899	1.412e-03
18	13281	PVtdT	NA	15	25	RSPagl	RSPd	39220	111899	3.505e-01
18	13281	PVtdT	NA	15	25	RSPv	RSPd	44307	111899	3.960e-01
18	13281	PVtdT	NA	15	25	SSp-bfd	RSPd	19	111899	1.698e-04
18	13281	PVtdT	NA	15	25	SSp-lj	RSPd	1	111899	8.937e-06
18	13281	PVtdT	NA	15	25	SSp-ll	RSPd	3	111899	2.681e-05
18	13281	PVtdT	NA	15	25	SSp-nm	RSPd	0	111899	0.000e+00
18	13281	PVtdT	NA	15	25	SSp-tr	RSPd	7	111899	6.256e-05
18	13281	PVtdT	NA	15	25	SSp-ul	RSPd	0	111899	0.000e+00
18	13281	PVtdT	NA	15	25	SSp-un	RSPd	0	111899	0.000e+00
18	13281	PVtdT	NA	15	25	SSs	RSPd	23	111899	2.055e-04
18	13281	PVtdT	NA	15	25	TEa	RSPd	6	111899	5.362e-05
18	13281	PVtdT	NA	15	25	TEp	RSPd	160	111899	1.430e-03
18	13281	PVtdT	NA	15	25	V1	RSPd	3349	111899	2.993e-02
18	13281	PVtdT	NA	15	25	VISC	RSPd	26	111899	2.324e-04
19	12112	PVtdT	F	24	NA	A	SSp-bfd	8294	58638	1.414e-01
19	12112	PVtdT	F	24	NA	ACAd	SSp-bfd	944	58638	1.610e-02
19	12112	PVtdT	F	24	NA	ACAv	SSp-bfd	264	58638	4.502e-03
19	12112	PVtdT	F	24	NA	AId	SSp-bfd	82	58638	1.398e-03
19	12112	PVtdT	F	24	NA	AIp	SSp-bfd	59	58638	1.006e-03
19	12112	PVtdT	F	24	NA	AIv	SSp-bfd	1	58638	1.705e-05
19	12112	PVtdT	F	24	NA	AL	SSp-bfd	795	58638	1.356e-02
19	12112	PVtdT	F	24	NA	AM	SSp-bfd	606	58638	1.033e-02
19	12112	PVtdT	F	24	NA	AUDd	SSp-bfd	1319	58638	2.249e-02
19	12112	PVtdT	F	24	NA	AUDp	SSp-bfd	1204	58638	2.053e-02
19	12112	PVtdT	F	24	NA	AUDpo	SSp-bfd	24	58638	4.093e-04
19	12112	PVtdT	F	24	NA	AUDv	SSp-bfd	132	58638	2.251e-03
19	12112	PVtdT	F	24	NA	DP	SSp-bfd	126	58638	2.149e-03
19	12112	PVtdT	F	24	NA	ECT	SSp-bfd	400	58638	6.822e-03
19	12112	PVtdT	F	24	NA	FRP	SSp-bfd	29	58638	4.946e-04
19	12112	PVtdT	F	24	NA	GU	SSp-bfd	27	58638	4.605e-04
19	12112	PVtdT	F	24	NA	ILA	SSp-bfd	24	58638	4.093e-04
19	12112	PVtdT	F	24	NA	LI	SSp-bfd	125	58638	2.132e-03
19	12112	PVtdT	F	24	NA	LLA	SSp-bfd	627	58638	1.069e-02
19	12112	PVtdT	F	24	NA	LM	SSp-bfd	380	58638	6.480e-03
19	12112	PVtdT	F	24	NA	MM	SSp-bfd	85	58638	1.450e-03
19	12112	PVtdT	F	24	NA	MOp	SSp-bfd	2645	58638	4.511e-02
19	12112	PVtdT	F	24	NA	MOs	SSp-bfd	3178	58638	5.420e-02
19	12112	PVtdT	F	24	NA	ORBl	SSp-bfd	66	58638	1.126e-03
19	12112	PVtdT	F	24	NA	ORBm	SSp-bfd	23	58638	3.922e-04
19	12112	PVtdT	F	24	NA	P	SSp-bfd	9	58638	1.535e-04
19	12112	PVtdT	F	24	NA	PERI	SSp-bfd	66	58638	1.126e-03
19	12112	PVtdT	F	24	NA	PL	SSp-bfd	105	58638	1.791e-03
19	12112	PVtdT	F	24	NA	PM	SSp-bfd	102	58638	1.739e-03
19	12112	PVtdT	F	24	NA	POR	SSp-bfd	7	58638	1.194e-04
19	12112	PVtdT	F	24	NA	PORa	SSp-bfd	17	58638	2.899e-04
19	12112	PVtdT	F	24	NA	RL	SSp-bfd	8780	58638	1.497e-01
19	12112	PVtdT	F	24	NA	RSPagl	SSp-bfd	242	58638	4.127e-03
19	12112	PVtdT	F	24	NA	RSPd	SSp-bfd	287	58638	4.894e-03
19	12112	PVtdT	F	24	NA	RSPv	SSp-bfd	465	58638	7.930e-03
19	12112	PVtdT	F	24	NA	SSp-lj	SSp-bfd	46	58638	7.845e-04
19	12112	PVtdT	F	24	NA	SSp-ll	SSp-bfd	193	58638	3.291e-03
19	12112	PVtdT	F	24	NA	SSp-nm	SSp-bfd	1	58638	1.705e-05
19	12112	PVtdT	F	24	NA	SSp-tr	SSp-bfd	7658	58638	1.306e-01
19	12112	PVtdT	F	24	NA	SSp-ul	SSp-bfd	482	58638	8.220e-03
19	12112	PVtdT	F	24	NA	SSp-un	SSp-bfd	3248	58638	5.539e-02
19	12112	PVtdT	F	24	NA	SSs	SSp-bfd	9153	58638	1.561e-01
19	12112	PVtdT	F	24	NA	TEa	SSp-bfd	520	58638	8.868e-03
19	12112	PVtdT	F	24	NA	TEp	SSp-bfd	61	58638	1.040e-03
19	12112	PVtdT	F	24	NA	V1	SSp-bfd	4526	58638	7.719e-02
19	12112	PVtdT	F	24	NA	VISC	SSp-bfd	1211	58638	2.065e-02
20	12113	PVtdT	F	24	NA	A	SSp-bfd	5121	73743	6.944e-02
20	12113	PVtdT	F	24	NA	ACAd	SSp-bfd	1314	73743	1.782e-02
20	12113	PVtdT	F	24	NA	ACAv	SSp-bfd	265	73743	3.594e-03
20	12113	PVtdT	F	24	NA	AId	SSp-bfd	51	73743	6.916e-04
20	12113	PVtdT	F	24	NA	AIp	SSp-bfd	403	73743	5.465e-03
20	12113	PVtdT	F	24	NA	AIv	SSp-bfd	12	73743	1.627e-04
20	12113	PVtdT	F	24	NA	AL	SSp-bfd	426	73743	5.777e-03
20	12113	PVtdT	F	24	NA	AM	SSp-bfd	853	73743	1.157e-02
20	12113	PVtdT	F	24	NA	AUDd	SSp-bfd	2366	73743	3.208e-02
20	12113	PVtdT	F	24	NA	AUDp	SSp-bfd	1811	73743	2.456e-02
20	12113	PVtdT	F	24	NA	AUDpo	SSp-bfd	94	73743	1.275e-03
20	12113	PVtdT	F	24	NA	AUDv	SSp-bfd	373	73743	5.058e-03
20	12113	PVtdT	F	24	NA	DP	SSp-bfd	271	73743	3.675e-03
20	12113	PVtdT	F	24	NA	ECT	SSp-bfd	550	73743	7.458e-03
20	12113	PVtdT	F	24	NA	FRP	SSp-bfd	62	73743	8.408e-04
20	12113	PVtdT	F	24	NA	GU	SSp-bfd	16	73743	2.170e-04
20	12113	PVtdT	F	24	NA	ILA	SSp-bfd	91	73743	1.234e-03
20	12113	PVtdT	F	24	NA	LI	SSp-bfd	438	73743	5.940e-03
20	12113	PVtdT	F	24	NA	LLA	SSp-bfd	388	73743	5.262e-03
20	12113	PVtdT	F	24	NA	LM	SSp-bfd	558	73743	7.567e-03
20	12113	PVtdT	F	24	NA	MM	SSp-bfd	135	73743	1.831e-03
20	12113	PVtdT	F	24	NA	MOp	SSp-bfd	5125	73743	6.950e-02
20	12113	PVtdT	F	24	NA	MOs	SSp-bfd	5206	73743	7.060e-02
20	12113	PVtdT	F	24	NA	ORBl	SSp-bfd	314	73743	4.258e-03
20	12113	PVtdT	F	24	NA	ORBm	SSp-bfd	19	73743	2.577e-04
20	12113	PVtdT	F	24	NA	P	SSp-bfd	30	73743	4.068e-04
20	12113	PVtdT	F	24	NA	PERI	SSp-bfd	500	73743	6.780e-03
20	12113	PVtdT	F	24	NA	PL	SSp-bfd	93	73743	1.261e-03
20	12113	PVtdT	F	24	NA	PM	SSp-bfd	720	73743	9.764e-03
20	12113	PVtdT	F	24	NA	POR	SSp-bfd	31	73743	4.204e-04
20	12113	PVtdT	F	24	NA	PORa	SSp-bfd	16	73743	2.170e-04
20	12113	PVtdT	F	24	NA	RL	SSp-bfd	8722	73743	1.183e-01
20	12113	PVtdT	F	24	NA	RSPagl	SSp-bfd	462	73743	6.265e-03
20	12113	PVtdT	F	24	NA	RSPd	SSp-bfd	586	73743	7.947e-03
20	12113	PVtdT	F	24	NA	RSPv	SSp-bfd	319	73743	4.326e-03
20	12113	PVtdT	F	24	NA	SSp-lj	SSp-bfd	69	73743	9.357e-04
20	12113	PVtdT	F	24	NA	SSp-ll	SSp-bfd	287	73743	3.892e-03
20	12113	PVtdT	F	24	NA	SSp-nm	SSp-bfd	1	73743	1.356e-05
20	12113	PVtdT	F	24	NA	SSp-tr	SSp-bfd	6302	73743	8.546e-02
20	12113	PVtdT	F	24	NA	SSp-ul	SSp-bfd	1266	73743	1.717e-02
20	12113	PVtdT	F	24	NA	SSp-un	SSp-bfd	7405	73743	1.004e-01
20	12113	PVtdT	F	24	NA	SSs	SSp-bfd	10837	73743	1.470e-01
20	12113	PVtdT	F	24	NA	TEa	SSp-bfd	729	73743	9.886e-03
20	12113	PVtdT	F	24	NA	TEp	SSp-bfd	135	73743	1.831e-03
20	12113	PVtdT	F	24	NA	V1	SSp-bfd	5885	73743	7.980e-02
20	12113	PVtdT	F	24	NA	VISC	SSp-bfd	3086	73743	4.185e-02
21	13052	PVtdT	NA	8	NA	A	SSp-un	1900	175318	1.084e-02
21	13052	PVtdT	NA	8	NA	ACAd	SSp-un	98	175318	5.590e-04
21	13052	PVtdT	NA	8	NA	ACAv	SSp-un	26	175318	1.483e-04
21	13052	PVtdT	NA	8	NA	AId	SSp-un	48	175318	2.738e-04
21	13052	PVtdT	NA	8	NA	AIp	SSp-un	32	175318	1.825e-04
21	13052	PVtdT	NA	8	NA	AIv	SSp-un	1	175318	5.704e-06
21	13052	PVtdT	NA	8	NA	AL	SSp-un	54	175318	3.080e-04
21	13052	PVtdT	NA	8	NA	AM	SSp-un	130	175318	7.415e-04
21	13052	PVtdT	NA	8	NA	AUDd	SSp-un	2910	175318	1.660e-02
21	13052	PVtdT	NA	8	NA	AUDp	SSp-un	1714	175318	9.777e-03
21	13052	PVtdT	NA	8	NA	AUDpo	SSp-un	9	175318	5.134e-05
21	13052	PVtdT	NA	8	NA	AUDv	SSp-un	615	175318	3.508e-03
21	13052	PVtdT	NA	8	NA	DP	SSp-un	41	175318	2.339e-04
21	13052	PVtdT	NA	8	NA	ECT	SSp-un	31	175318	1.768e-04
21	13052	PVtdT	NA	8	NA	FRP	SSp-un	12	175318	6.845e-05
21	13052	PVtdT	NA	8	NA	GU	SSp-un	24	175318	1.369e-04
21	13052	PVtdT	NA	8	NA	ILA	SSp-un	6	175318	3.422e-05
21	13052	PVtdT	NA	8	NA	LI	SSp-un	9	175318	5.134e-05
21	13052	PVtdT	NA	8	NA	LLA	SSp-un	62	175318	3.536e-04
21	13052	PVtdT	NA	8	NA	LM	SSp-un	24	175318	1.369e-04
21	13052	PVtdT	NA	8	NA	MM	SSp-un	81	175318	4.620e-04
21	13052	PVtdT	NA	8	NA	MOp	SSp-un	9899	175318	5.646e-02
21	13052	PVtdT	NA	8	NA	MOs	SSp-un	486	175318	2.772e-03
21	13052	PVtdT	NA	8	NA	ORBl	SSp-un	17	175318	9.697e-05
21	13052	PVtdT	NA	8	NA	ORBm	SSp-un	2	175318	1.141e-05
21	13052	PVtdT	NA	8	NA	P	SSp-un	0	175318	0.000e+00
21	13052	PVtdT	NA	8	NA	PERI	SSp-un	14	175318	7.985e-05
21	13052	PVtdT	NA	8	NA	PL	SSp-un	143	175318	8.157e-04
21	13052	PVtdT	NA	8	NA	PM	SSp-un	34	175318	1.939e-04
21	13052	PVtdT	NA	8	NA	POR	SSp-un	4	175318	2.282e-05
21	13052	PVtdT	NA	8	NA	PORa	SSp-un	0	175318	0.000e+00
21	13052	PVtdT	NA	8	NA	RL	SSp-un	961	175318	5.481e-03
21	13052	PVtdT	NA	8	NA	RSPagl	SSp-un	364	175318	2.076e-03
21	13052	PVtdT	NA	8	NA	RSPd	SSp-un	349	175318	1.991e-03
21	13052	PVtdT	NA	8	NA	RSPv	SSp-un	124	175318	7.073e-04
21	13052	PVtdT	NA	8	NA	SSp-bfd	SSp-un	49489	175318	2.823e-01
21	13052	PVtdT	NA	8	NA	SSp-lj	SSp-un	697	175318	3.976e-03
21	13052	PVtdT	NA	8	NA	SSp-ll	SSp-un	27919	175318	1.592e-01
21	13052	PVtdT	NA	8	NA	SSp-nm	SSp-un	1	175318	5.704e-06
21	13052	PVtdT	NA	8	NA	SSp-tr	SSp-un	35515	175318	2.026e-01
21	13052	PVtdT	NA	8	NA	SSp-ul	SSp-un	32045	175318	1.828e-01
21	13052	PVtdT	NA	8	NA	SSs	SSp-un	6050	175318	3.451e-02
21	13052	PVtdT	NA	8	NA	TEa	SSp-un	249	175318	1.420e-03
21	13052	PVtdT	NA	8	NA	TEp	SSp-un	9	175318	5.134e-05
21	13052	PVtdT	NA	8	NA	V1	SSp-un	123	175318	7.016e-04
21	13052	PVtdT	NA	8	NA	VISC	SSp-un	2997	175318	1.709e-02
22	13340	PVtdT	NA	14	24	A	SSs	1120	208284	5.377e-03
22	13340	PVtdT	NA	14	24	ACAd	SSs	434	208284	2.084e-03
22	13340	PVtdT	NA	14	24	ACAv	SSs	18	208284	8.642e-05
22	13340	PVtdT	NA	14	24	AId	SSs	754	208284	3.620e-03
22	13340	PVtdT	NA	14	24	AIp	SSs	1260	208284	6.049e-03
22	13340	PVtdT	NA	14	24	AIv	SSs	84	208284	4.033e-04
22	13340	PVtdT	NA	14	24	AL	SSs	441	208284	2.117e-03
22	13340	PVtdT	NA	14	24	AM	SSs	233	208284	1.119e-03
22	13340	PVtdT	NA	14	24	AUDd	SSs	10709	208284	5.142e-02
22	13340	PVtdT	NA	14	24	AUDp	SSs	10424	208284	5.005e-02
22	13340	PVtdT	NA	14	24	AUDpo	SSs	546	208284	2.621e-03
22	13340	PVtdT	NA	14	24	AUDv	SSs	3632	208284	1.744e-02
22	13340	PVtdT	NA	14	24	DP	SSs	264	208284	1.268e-03
22	13340	PVtdT	NA	14	24	ECT	SSs	1418	208284	6.808e-03
22	13340	PVtdT	NA	14	24	FRP	SSs	694	208284	3.332e-03
22	13340	PVtdT	NA	14	24	GU	SSs	647	208284	3.106e-03
22	13340	PVtdT	NA	14	24	ILA	SSs	7	208284	3.361e-05
22	13340	PVtdT	NA	14	24	LI	SSs	120	208284	5.761e-04
22	13340	PVtdT	NA	14	24	LLA	SSs	527	208284	2.530e-03
22	13340	PVtdT	NA	14	24	LM	SSs	91	208284	4.369e-04
22	13340	PVtdT	NA	14	24	MM	SSs	132	208284	6.338e-04
22	13340	PVtdT	NA	14	24	MOp	SSs	17679	208284	8.488e-02
22	13340	PVtdT	NA	14	24	MOs	SSs	7626	208284	3.661e-02
22	13340	PVtdT	NA	14	24	ORBl	SSs	602	208284	2.890e-03
22	13340	PVtdT	NA	14	24	ORBm	SSs	410	208284	1.968e-03
22	13340	PVtdT	NA	14	24	P	SSs	2	208284	9.602e-06
22	13340	PVtdT	NA	14	24	PERI	SSs	867	208284	4.163e-03
22	13340	PVtdT	NA	14	24	PL	SSs	1114	208284	5.348e-03
22	13340	PVtdT	NA	14	24	PM	SSs	23	208284	1.104e-04
22	13340	PVtdT	NA	14	24	POR	SSs	18	208284	8.642e-05
22	13340	PVtdT	NA	14	24	PORa	SSs	13	208284	6.241e-05
22	13340	PVtdT	NA	14	24	RL	SSs	1432	208284	6.875e-03
22	13340	PVtdT	NA	14	24	RSPagl	SSs	118	208284	5.665e-04
22	13340	PVtdT	NA	14	24	RSPd	SSs	64	208284	3.073e-04
22	13340	PVtdT	NA	14	24	RSPv	SSs	205	208284	9.842e-04
22	13340	PVtdT	NA	14	24	SSp-bfd	SSs	70691	208284	3.394e-01
22	13340	PVtdT	NA	14	24	SSp-lj	SSs	711	208284	3.414e-03
22	13340	PVtdT	NA	14	24	SSp-ll	SSs	9114	208284	4.376e-02
22	13340	PVtdT	NA	14	24	SSp-nm	SSs	57	208284	2.737e-04
22	13340	PVtdT	NA	14	24	SSp-tr	SSs	5534	208284	2.657e-02
22	13340	PVtdT	NA	14	24	SSp-ul	SSs	6447	208284	3.095e-02
22	13340	PVtdT	NA	14	24	SSp-un	SSs	13214	208284	6.344e-02
22	13340	PVtdT	NA	14	24	TEa	SSs	5815	208284	2.792e-02
22	13340	PVtdT	NA	14	24	TEp	SSs	428	208284	2.055e-03
22	13340	PVtdT	NA	14	24	V1	SSs	123	208284	5.905e-04
22	13340	PVtdT	NA	14	24	VISC	SSs	32422	208284	1.557e-01
23	11056	C57BL/6J	NA	12	NA	A	V1	5	16846	2.968e-04
23	11056	C57BL/6J	NA	12	NA	ACAd	V1	72	16846	4.274e-03
23	11056	C57BL/6J	NA	12	NA	ACAv	V1	106	16846	6.292e-03
23	11056	C57BL/6J	NA	12	NA	AId	V1	2	16846	1.187e-04
23	11056	C57BL/6J	NA	12	NA	AIp	V1	5	16846	2.968e-04
23	11056	C57BL/6J	NA	12	NA	AIv	V1	0	16846	0.000e+00
23	11056	C57BL/6J	NA	12	NA	AL	V1	408	16846	2.422e-02
23	11056	C57BL/6J	NA	12	NA	AM	V1	40	16846	2.374e-03
23	11056	C57BL/6J	NA	12	NA	AUDd	V1	14	16846	8.311e-04
23	11056	C57BL/6J	NA	12	NA	AUDp	V1	115	16846	6.827e-03
23	11056	C57BL/6J	NA	12	NA	AUDpo	V1	120	16846	7.123e-03
23	11056	C57BL/6J	NA	12	NA	AUDv	V1	79	16846	4.690e-03
23	11056	C57BL/6J	NA	12	NA	DP	V1	51	16846	3.027e-03
23	11056	C57BL/6J	NA	12	NA	ECT	V1	651	16846	3.864e-02
23	11056	C57BL/6J	NA	12	NA	FRP	V1	1	16846	5.936e-05
23	11056	C57BL/6J	NA	12	NA	GU	V1	0	16846	0.000e+00
23	11056	C57BL/6J	NA	12	NA	ILA	V1	3	16846	1.781e-04
23	11056	C57BL/6J	NA	12	NA	LI	V1	339	16846	2.012e-02
23	11056	C57BL/6J	NA	12	NA	LLA	V1	29	16846	1.721e-03
23	11056	C57BL/6J	NA	12	NA	LM	V1	6854	16846	4.069e-01
23	11056	C57BL/6J	NA	12	NA	MM	V1	156	16846	9.260e-03
23	11056	C57BL/6J	NA	12	NA	MOp	V1	5	16846	2.968e-04
23	11056	C57BL/6J	NA	12	NA	MOs	V1	9	16846	5.343e-04
23	11056	C57BL/6J	NA	12	NA	ORBl	V1	27	16846	1.603e-03
23	11056	C57BL/6J	NA	12	NA	ORBm	V1	17	16846	1.009e-03
23	11056	C57BL/6J	NA	12	NA	P	V1	1738	16846	1.032e-01
23	11056	C57BL/6J	NA	12	NA	PERI	V1	30	16846	1.781e-03
23	11056	C57BL/6J	NA	12	NA	PL	V1	0	16846	0.000e+00
23	11056	C57BL/6J	NA	12	NA	PM	V1	1000	16846	5.936e-02
23	11056	C57BL/6J	NA	12	NA	POR	V1	1077	16846	6.393e-02
23	11056	C57BL/6J	NA	12	NA	PORa	V1	235	16846	1.395e-02
23	11056	C57BL/6J	NA	12	NA	RL	V1	32	16846	1.900e-03
23	11056	C57BL/6J	NA	12	NA	RSPagl	V1	99	16846	5.877e-03
23	11056	C57BL/6J	NA	12	NA	RSPd	V1	764	16846	4.535e-02
23	11056	C57BL/6J	NA	12	NA	RSPv	V1	2391	16846	1.419e-01
23	11056	C57BL/6J	NA	12	NA	SSp-bfd	V1	20	16846	1.187e-03
23	11056	C57BL/6J	NA	12	NA	SSp-lj	V1	0	16846	0.000e+00
23	11056	C57BL/6J	NA	12	NA	SSp-ll	V1	2	16846	1.187e-04
23	11056	C57BL/6J	NA	12	NA	SSp-nm	V1	1	16846	5.936e-05
23	11056	C57BL/6J	NA	12	NA	SSp-tr	V1	1	16846	5.936e-05
23	11056	C57BL/6J	NA	12	NA	SSp-ul	V1	0	16846	0.000e+00
23	11056	C57BL/6J	NA	12	NA	SSp-un	V1	0	16846	0.000e+00
23	11056	C57BL/6J	NA	12	NA	SSs	V1	21	16846	1.247e-03
23	11056	C57BL/6J	NA	12	NA	TEa	V1	56	16846	3.324e-03
23	11056	C57BL/6J	NA	12	NA	TEp	V1	240	16846	1.425e-02
23	11056	C57BL/6J	NA	12	NA	VISC	V1	31	16846	1.840e-03
24	11149	C57BL/6J	NA	16	NA	A	V1	142	56023	2.535e-03
24	11149	C57BL/6J	NA	16	NA	ACAd	V1	484	56023	8.639e-03
24	11149	C57BL/6J	NA	16	NA	ACAv	V1	603	56023	1.076e-02
24	11149	C57BL/6J	NA	16	NA	AId	V1	150	56023	2.677e-03
24	11149	C57BL/6J	NA	16	NA	AIp	V1	17	56023	3.034e-04
24	11149	C57BL/6J	NA	16	NA	AIv	V1	27	56023	4.819e-04
24	11149	C57BL/6J	NA	16	NA	AL	V1	2785	56023	4.971e-02
24	11149	C57BL/6J	NA	16	NA	AM	V1	1025	56023	1.830e-02
24	11149	C57BL/6J	NA	16	NA	AUDd	V1	810	56023	1.446e-02
24	11149	C57BL/6J	NA	16	NA	AUDp	V1	1011	56023	1.805e-02
24	11149	C57BL/6J	NA	16	NA	AUDpo	V1	330	56023	5.890e-03
24	11149	C57BL/6J	NA	16	NA	AUDv	V1	396	56023	7.069e-03
24	11149	C57BL/6J	NA	16	NA	DP	V1	521	56023	9.300e-03
24	11149	C57BL/6J	NA	16	NA	ECT	V1	864	56023	1.542e-02
24	11149	C57BL/6J	NA	16	NA	FRP	V1	40	56023	7.140e-04
24	11149	C57BL/6J	NA	16	NA	GU	V1	3	56023	5.355e-05
24	11149	C57BL/6J	NA	16	NA	ILA	V1	122	56023	2.178e-03
24	11149	C57BL/6J	NA	16	NA	LI	V1	2698	56023	4.816e-02
24	11149	C57BL/6J	NA	16	NA	LLA	V1	615	56023	1.098e-02
24	11149	C57BL/6J	NA	16	NA	LM	V1	13024	56023	2.325e-01
24	11149	C57BL/6J	NA	16	NA	MM	V1	4077	56023	7.277e-02
24	11149	C57BL/6J	NA	16	NA	MOp	V1	77	56023	1.374e-03
24	11149	C57BL/6J	NA	16	NA	MOs	V1	232	56023	4.141e-03
24	11149	C57BL/6J	NA	16	NA	ORBl	V1	794	56023	1.417e-02
24	11149	C57BL/6J	NA	16	NA	ORBm	V1	34	56023	6.069e-04
24	11149	C57BL/6J	NA	16	NA	P	V1	3009	56023	5.371e-02
24	11149	C57BL/6J	NA	16	NA	PERI	V1	79	56023	1.410e-03
24	11149	C57BL/6J	NA	16	NA	PL	V1	124	56023	2.213e-03
24	11149	C57BL/6J	NA	16	NA	PM	V1	6317	56023	1.128e-01
24	11149	C57BL/6J	NA	16	NA	POR	V1	1503	56023	2.683e-02
24	11149	C57BL/6J	NA	16	NA	PORa	V1	732	56023	1.307e-02
24	11149	C57BL/6J	NA	16	NA	RL	V1	782	56023	1.396e-02
24	11149	C57BL/6J	NA	16	NA	RSPagl	V1	2230	56023	3.981e-02
24	11149	C57BL/6J	NA	16	NA	RSPd	V1	3917	56023	6.992e-02
24	11149	C57BL/6J	NA	16	NA	RSPv	V1	3470	56023	6.194e-02
24	11149	C57BL/6J	NA	16	NA	SSp-bfd	V1	330	56023	5.890e-03
24	11149	C57BL/6J	NA	16	NA	SSp-lj	V1	3	56023	5.355e-05
24	11149	C57BL/6J	NA	16	NA	SSp-ll	V1	24	56023	4.284e-04
24	11149	C57BL/6J	NA	16	NA	SSp-nm	V1	2	56023	3.570e-05
24	11149	C57BL/6J	NA	16	NA	SSp-tr	V1	78	56023	1.392e-03
24	11149	C57BL/6J	NA	16	NA	SSp-ul	V1	10	56023	1.785e-04
24	11149	C57BL/6J	NA	16	NA	SSp-un	V1	16	56023	2.856e-04
24	11149	C57BL/6J	NA	16	NA	SSs	V1	818	56023	1.460e-02
24	11149	C57BL/6J	NA	16	NA	TEa	V1	449	56023	8.015e-03
24	11149	C57BL/6J	NA	16	NA	TEp	V1	1023	56023	1.826e-02
24	11149	C57BL/6J	NA	16	NA	VISC	V1	226	56023	4.034e-03
25	12127	C57BL/6J	NA	25	NA	A	V1	206	32860	6.269e-03
25	12127	C57BL/6J	NA	25	NA	ACAd	V1	159	32860	4.839e-03
25	12127	C57BL/6J	NA	25	NA	ACAv	V1	256	32860	7.791e-03
25	12127	C57BL/6J	NA	25	NA	AId	V1	57	32860	1.735e-03
25	12127	C57BL/6J	NA	25	NA	AIp	V1	3	32860	9.130e-05
25	12127	C57BL/6J	NA	25	NA	AIv	V1	16	32860	4.869e-04
25	12127	C57BL/6J	NA	25	NA	AL	V1	476	32860	1.449e-02
25	12127	C57BL/6J	NA	25	NA	AM	V1	904	32860	2.751e-02
25	12127	C57BL/6J	NA	25	NA	AUDd	V1	219	32860	6.665e-03
25	12127	C57BL/6J	NA	25	NA	AUDp	V1	429	32860	1.306e-02
25	12127	C57BL/6J	NA	25	NA	AUDpo	V1	243	32860	7.395e-03
25	12127	C57BL/6J	NA	25	NA	AUDv	V1	83	32860	2.526e-03
25	12127	C57BL/6J	NA	25	NA	DP	V1	282	32860	8.582e-03
25	12127	C57BL/6J	NA	25	NA	ECT	V1	253	32860	7.699e-03
25	12127	C57BL/6J	NA	25	NA	FRP	V1	29	32860	8.825e-04
25	12127	C57BL/6J	NA	25	NA	GU	V1	3	32860	9.130e-05
25	12127	C57BL/6J	NA	25	NA	ILA	V1	4	32860	1.217e-04
25	12127	C57BL/6J	NA	25	NA	LI	V1	1142	32860	3.475e-02
25	12127	C57BL/6J	NA	25	NA	LLA	V1	399	32860	1.214e-02
25	12127	C57BL/6J	NA	25	NA	LM	V1	6692	32860	2.037e-01
25	12127	C57BL/6J	NA	25	NA	MM	V1	1638	32860	4.985e-02
25	12127	C57BL/6J	NA	25	NA	MOp	V1	63	32860	1.917e-03
25	12127	C57BL/6J	NA	25	NA	MOs	V1	150	32860	4.565e-03
25	12127	C57BL/6J	NA	25	NA	ORBl	V1	31	32860	9.434e-04
25	12127	C57BL/6J	NA	25	NA	ORBm	V1	362	32860	1.102e-02
25	12127	C57BL/6J	NA	25	NA	P	V1	2020	32860	6.147e-02
25	12127	C57BL/6J	NA	25	NA	PERI	V1	26	32860	7.912e-04
25	12127	C57BL/6J	NA	25	NA	PL	V1	20	32860	6.086e-04
25	12127	C57BL/6J	NA	25	NA	PM	V1	6055	32860	1.843e-01
25	12127	C57BL/6J	NA	25	NA	POR	V1	913	32860	2.778e-02
25	12127	C57BL/6J	NA	25	NA	PORa	V1	268	32860	8.156e-03
25	12127	C57BL/6J	NA	25	NA	RL	V1	199	32860	6.056e-03
25	12127	C57BL/6J	NA	25	NA	RSPagl	V1	2490	32860	7.578e-02
25	12127	C57BL/6J	NA	25	NA	RSPd	V1	2943	32860	8.956e-02
25	12127	C57BL/6J	NA	25	NA	RSPv	V1	2270	32860	6.908e-02
25	12127	C57BL/6J	NA	25	NA	SSp-bfd	V1	192	32860	5.843e-03
25	12127	C57BL/6J	NA	25	NA	SSp-lj	V1	4	32860	1.217e-04
25	12127	C57BL/6J	NA	25	NA	SSp-ll	V1	41	32860	1.248e-03
25	12127	C57BL/6J	NA	25	NA	SSp-nm	V1	0	32860	0.000e+00
25	12127	C57BL/6J	NA	25	NA	SSp-tr	V1	128	32860	3.895e-03
25	12127	C57BL/6J	NA	25	NA	SSp-ul	V1	15	32860	4.565e-04
25	12127	C57BL/6J	NA	25	NA	SSp-un	V1	10	32860	3.043e-04
25	12127	C57BL/6J	NA	25	NA	SSs	V1	345	32860	1.050e-02
25	12127	C57BL/6J	NA	25	NA	TEa	V1	39	32860	1.187e-03
25	12127	C57BL/6J	NA	25	NA	TEp	V1	725	32860	2.206e-02
25	12127	C57BL/6J	NA	25	NA	VISC	V1	58	32860	1.765e-03
26	13269	PVtdT	NA	14	30	A	V1	26	21175	1.228e-03
26	13269	PVtdT	NA	14	30	ACAd	V1	115	21175	5.431e-03
26	13269	PVtdT	NA	14	30	ACAv	V1	82	21175	3.872e-03
26	13269	PVtdT	NA	14	30	AId	V1	3	21175	1.417e-04
26	13269	PVtdT	NA	14	30	AIp	V1	6	21175	2.834e-04
26	13269	PVtdT	NA	14	30	AIv	V1	5	21175	2.361e-04
26	13269	PVtdT	NA	14	30	AL	V1	1473	21175	6.956e-02
26	13269	PVtdT	NA	14	30	AM	V1	164	21175	7.745e-03
26	13269	PVtdT	NA	14	30	AUDd	V1	131	21175	6.187e-03
26	13269	PVtdT	NA	14	30	AUDp	V1	356	21175	1.681e-02
26	13269	PVtdT	NA	14	30	AUDpo	V1	132	21175	6.234e-03
26	13269	PVtdT	NA	14	30	AUDv	V1	181	21175	8.548e-03
26	13269	PVtdT	NA	14	30	DP	V1	224	21175	1.058e-02
26	13269	PVtdT	NA	14	30	ECT	V1	480	21175	2.267e-02
26	13269	PVtdT	NA	14	30	FRP	V1	16	21175	7.556e-04
26	13269	PVtdT	NA	14	30	GU	V1	1	21175	4.723e-05
26	13269	PVtdT	NA	14	30	ILA	V1	18	21175	8.501e-04
26	13269	PVtdT	NA	14	30	LI	V1	1695	21175	8.005e-02
26	13269	PVtdT	NA	14	30	LLA	V1	184	21175	8.689e-03
26	13269	PVtdT	NA	14	30	LM	V1	4863	21175	2.297e-01
26	13269	PVtdT	NA	14	30	MM	V1	445	21175	2.102e-02
26	13269	PVtdT	NA	14	30	MOp	V1	41	21175	1.936e-03
26	13269	PVtdT	NA	14	30	MOs	V1	51	21175	2.409e-03
26	13269	PVtdT	NA	14	30	ORBl	V1	50	21175	2.361e-03
26	13269	PVtdT	NA	14	30	ORBm	V1	89	21175	4.203e-03
26	13269	PVtdT	NA	14	30	P	V1	1406	21175	6.640e-02
26	13269	PVtdT	NA	14	30	PERI	V1	62	21175	2.928e-03
26	13269	PVtdT	NA	14	30	PL	V1	45	21175	2.125e-03
26	13269	PVtdT	NA	14	30	PM	V1	1674	21175	7.906e-02
26	13269	PVtdT	NA	14	30	POR	V1	617	21175	2.914e-02
26	13269	PVtdT	NA	14	30	PORa	V1	192	21175	9.067e-03
26	13269	PVtdT	NA	14	30	RL	V1	469	21175	2.215e-02
26	13269	PVtdT	NA	14	30	RSPagl	V1	795	21175	3.754e-02
26	13269	PVtdT	NA	14	30	RSPd	V1	2789	21175	1.317e-01
26	13269	PVtdT	NA	14	30	RSPv	V1	1508	21175	7.122e-02
26	13269	PVtdT	NA	14	30	SSp-bfd	V1	114	21175	5.384e-03
26	13269	PVtdT	NA	14	30	SSp-lj	V1	1	21175	4.723e-05
26	13269	PVtdT	NA	14	30	SSp-ll	V1	5	21175	2.361e-04
26	13269	PVtdT	NA	14	30	SSp-nm	V1	0	21175	0.000e+00
26	13269	PVtdT	NA	14	30	SSp-tr	V1	8	21175	3.778e-04
26	13269	PVtdT	NA	14	30	SSp-ul	V1	1	21175	4.723e-05
26	13269	PVtdT	NA	14	30	SSp-un	V1	3	21175	1.417e-04
26	13269	PVtdT	NA	14	30	SSs	V1	113	21175	5.336e-03
26	13269	PVtdT	NA	14	30	TEa	V1	131	21175	6.187e-03
26	13269	PVtdT	NA	14	30	TEp	V1	357	21175	1.686e-02
26	13269	PVtdT	NA	14	30	VISC	V1	54	21175	2.550e-03
27	14006	PVtdT	NA	12	NA	A	VISC	153	268646	5.695e-04
27	14006	PVtdT	NA	12	NA	ACAd	VISC	528	268646	1.965e-03
27	14006	PVtdT	NA	12	NA	ACAv	VISC	98	268646	3.648e-04
27	14006	PVtdT	NA	12	NA	AId	VISC	14001	268646	5.212e-02
27	14006	PVtdT	NA	12	NA	AIp	VISC	33700	268646	1.254e-01
27	14006	PVtdT	NA	12	NA	AIv	VISC	8422	268646	3.135e-02
27	14006	PVtdT	NA	12	NA	AL	VISC	14	268646	5.211e-05
27	14006	PVtdT	NA	12	NA	AM	VISC	48	268646	1.787e-04
27	14006	PVtdT	NA	12	NA	AUDd	VISC	5223	268646	1.944e-02
27	14006	PVtdT	NA	12	NA	AUDp	VISC	7138	268646	2.657e-02
27	14006	PVtdT	NA	12	NA	AUDpo	VISC	271	268646	1.009e-03
27	14006	PVtdT	NA	12	NA	AUDv	VISC	8249	268646	3.071e-02
27	14006	PVtdT	NA	12	NA	DP	VISC	79	268646	2.941e-04
27	14006	PVtdT	NA	12	NA	ECT	VISC	1725	268646	6.421e-03
27	14006	PVtdT	NA	12	NA	FRP	VISC	2821	268646	1.050e-02
27	14006	PVtdT	NA	12	NA	GU	VISC	14059	268646	5.233e-02
27	14006	PVtdT	NA	12	NA	ILA	VISC	204	268646	7.594e-04
27	14006	PVtdT	NA	12	NA	LI	VISC	26	268646	9.678e-05
27	14006	PVtdT	NA	12	NA	LLA	VISC	55	268646	2.047e-04
27	14006	PVtdT	NA	12	NA	LM	VISC	25	268646	9.306e-05
27	14006	PVtdT	NA	12	NA	MM	VISC	63	268646	2.345e-04
27	14006	PVtdT	NA	12	NA	MOp	VISC	22224	268646	8.273e-02
27	14006	PVtdT	NA	12	NA	MOs	VISC	6875	268646	2.559e-02
27	14006	PVtdT	NA	12	NA	ORBl	VISC	1650	268646	6.142e-03
27	14006	PVtdT	NA	12	NA	ORBm	VISC	679	268646	2.527e-03
27	14006	PVtdT	NA	12	NA	P	VISC	7	268646	2.606e-05
27	14006	PVtdT	NA	12	NA	PERI	VISC	2894	268646	1.077e-02
27	14006	PVtdT	NA	12	NA	PL	VISC	1522	268646	5.665e-03
27	14006	PVtdT	NA	12	NA	PM	VISC	3	268646	1.117e-05
27	14006	PVtdT	NA	12	NA	POR	VISC	15	268646	5.584e-05
27	14006	PVtdT	NA	12	NA	PORa	VISC	15	268646	5.584e-05
27	14006	PVtdT	NA	12	NA	RL	VISC	99	268646	3.685e-04
27	14006	PVtdT	NA	12	NA	RSPagl	VISC	108	268646	4.020e-04
27	14006	PVtdT	NA	12	NA	RSPd	VISC	23	268646	8.561e-05
27	14006	PVtdT	NA	12	NA	RSPv	VISC	6	268646	2.233e-05
27	14006	PVtdT	NA	12	NA	SSp-bfd	VISC	23009	268646	8.565e-02
27	14006	PVtdT	NA	12	NA	SSp-lj	VISC	5764	268646	2.146e-02
27	14006	PVtdT	NA	12	NA	SSp-ll	VISC	1950	268646	7.259e-03
27	14006	PVtdT	NA	12	NA	SSp-nm	VISC	4731	268646	1.761e-02
27	14006	PVtdT	NA	12	NA	SSp-tr	VISC	1564	268646	5.822e-03
27	14006	PVtdT	NA	12	NA	SSp-ul	VISC	6058	268646	2.255e-02
27	14006	PVtdT	NA	12	NA	SSp-un	VISC	4830	268646	1.798e-02
27	14006	PVtdT	NA	12	NA	SSs	VISC	70087	268646	2.609e-01
27	14006	PVtdT	NA	12	NA	TEa	VISC	17414	268646	6.482e-02
27	14006	PVtdT	NA	12	NA	TEp	VISC	186	268646	6.924e-04
27	14006	PVtdT	NA	12	NA	V1	VISC	31	268646	1.154e-04
