# Supplementary material
Source: ML conference proceedings conference paper supplement (https://openreview.net/forum?id=w2vMTPxI6y)

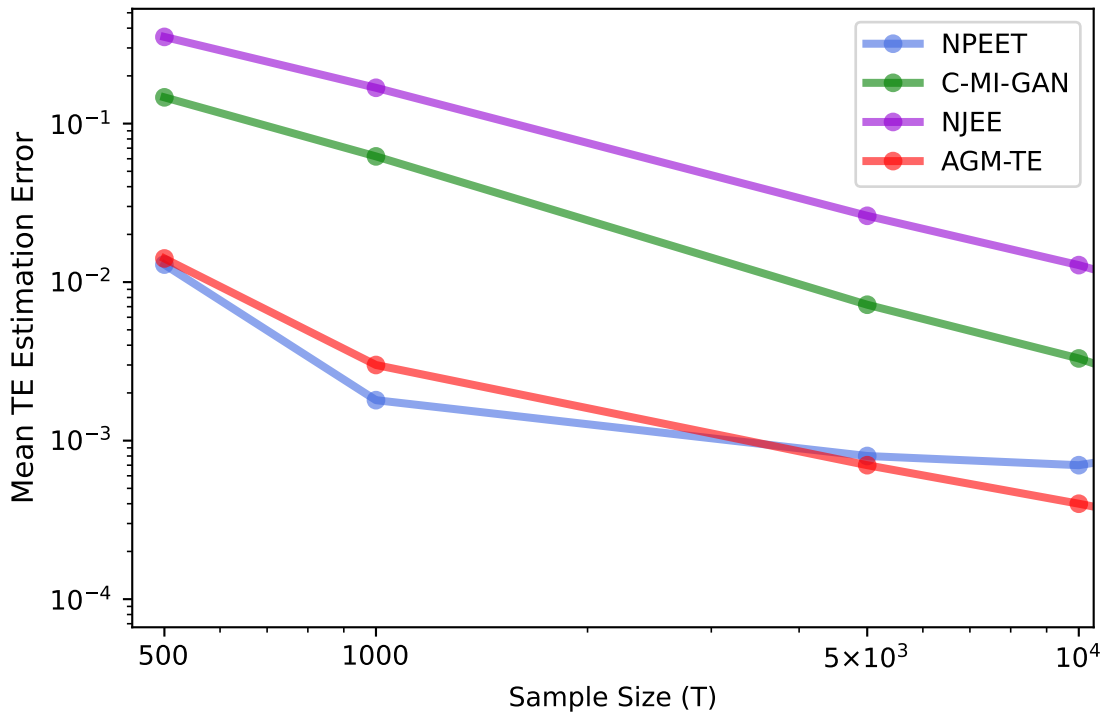

Supplement: supplementary_material [file attachment]

Linear Gaussian

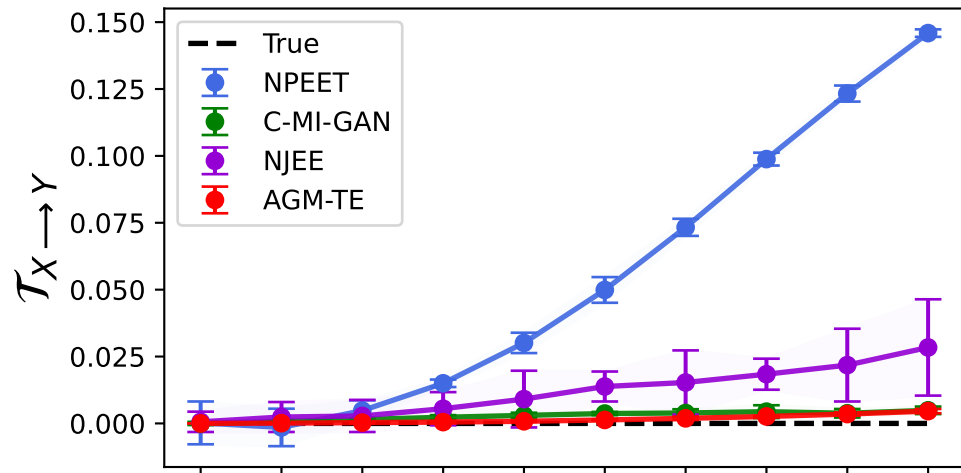

Joint Process

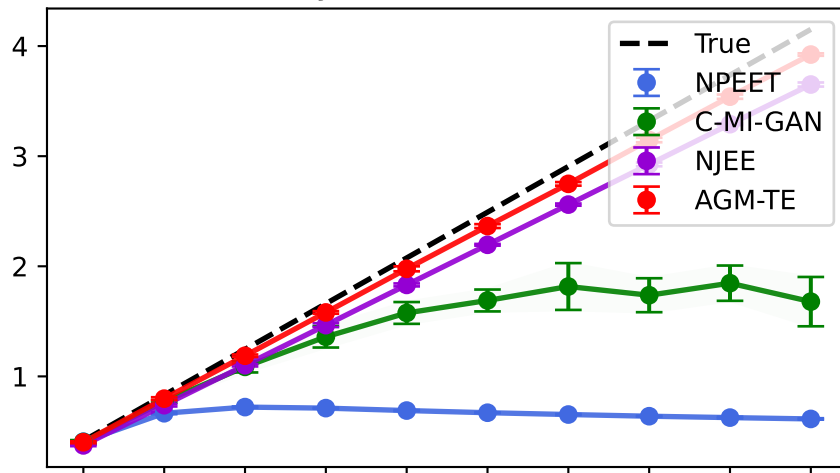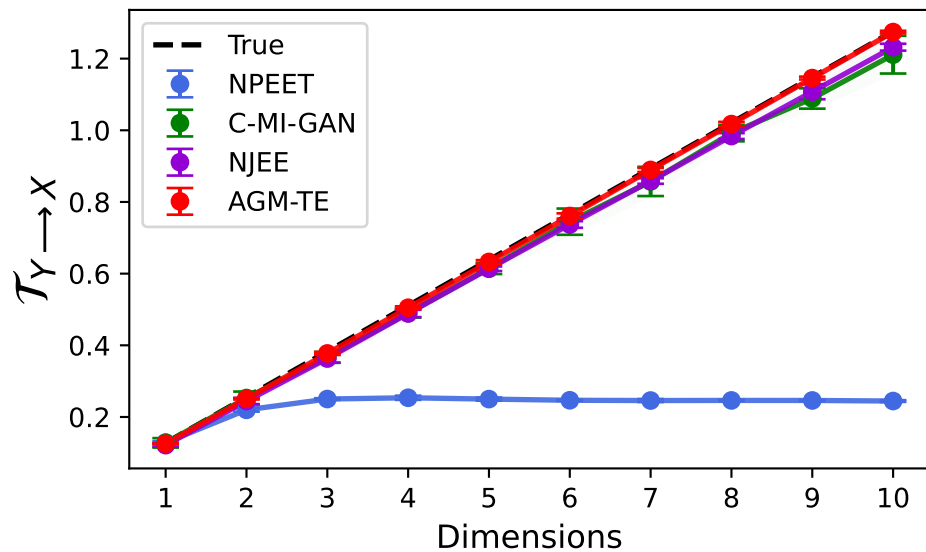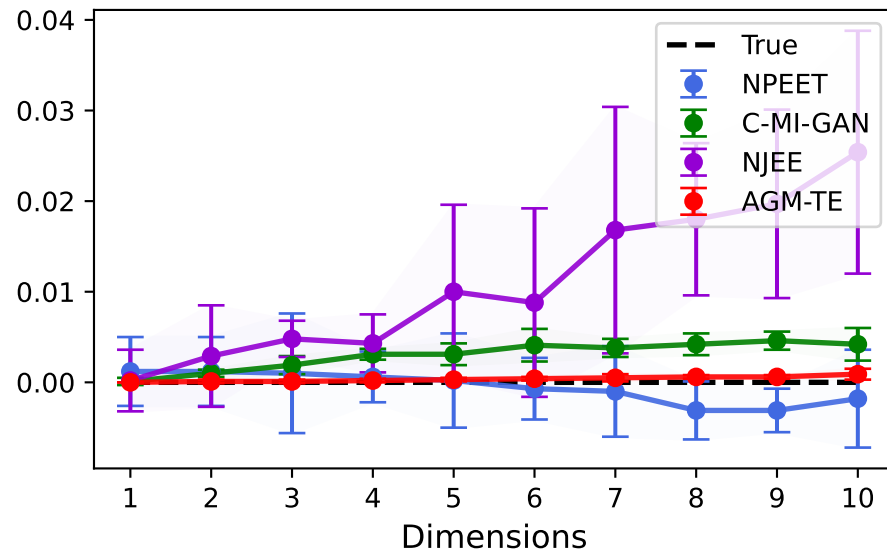

Supplement: supplementary_material [file attachment]

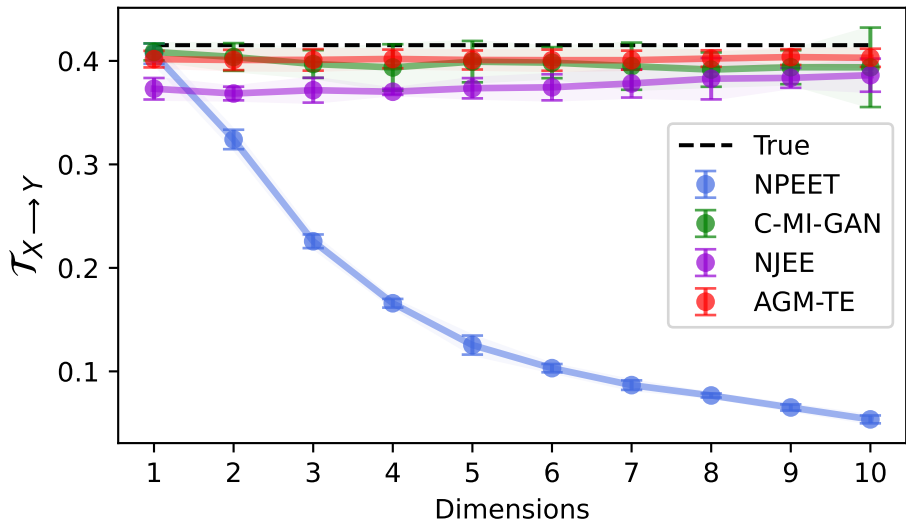

Supplement: supplementary_material [file attachment]

Linear Gaussian

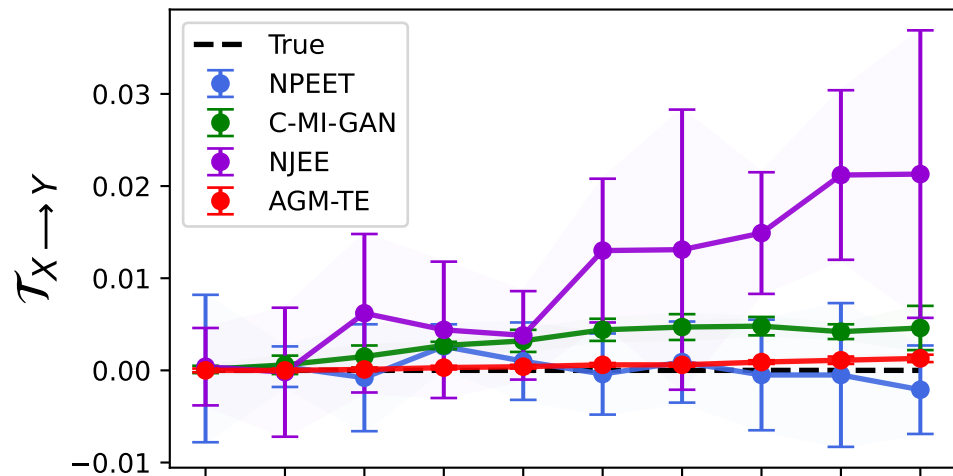

Joint Process

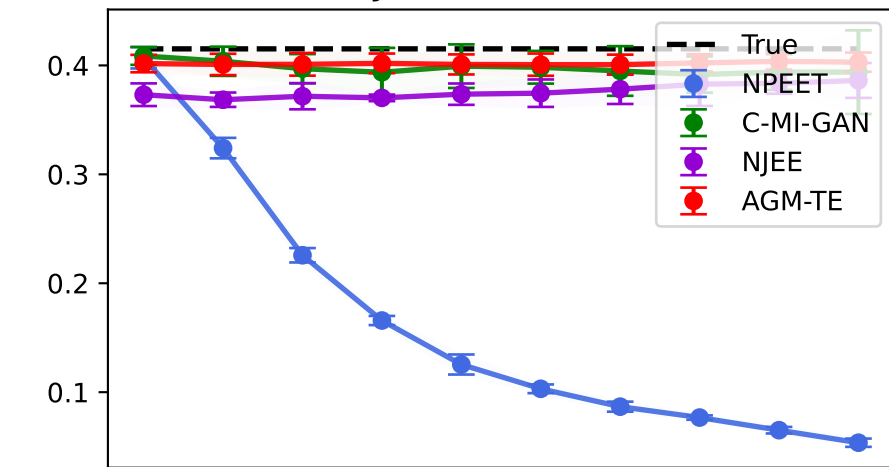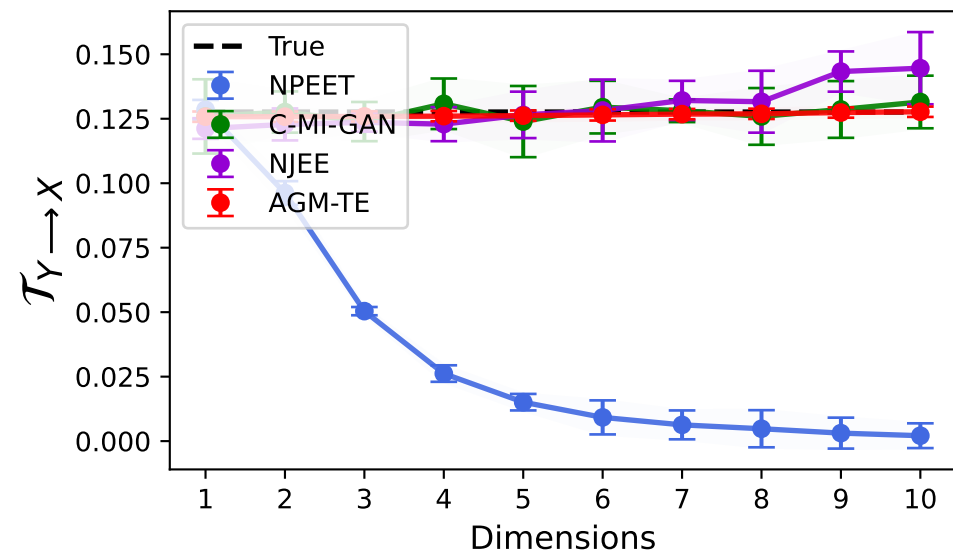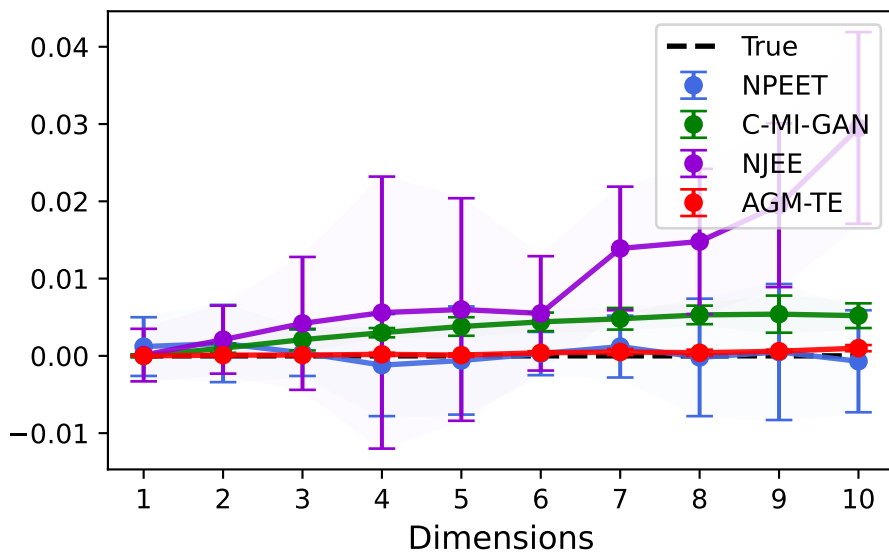

Supplement: supplementary_material [file attachment]

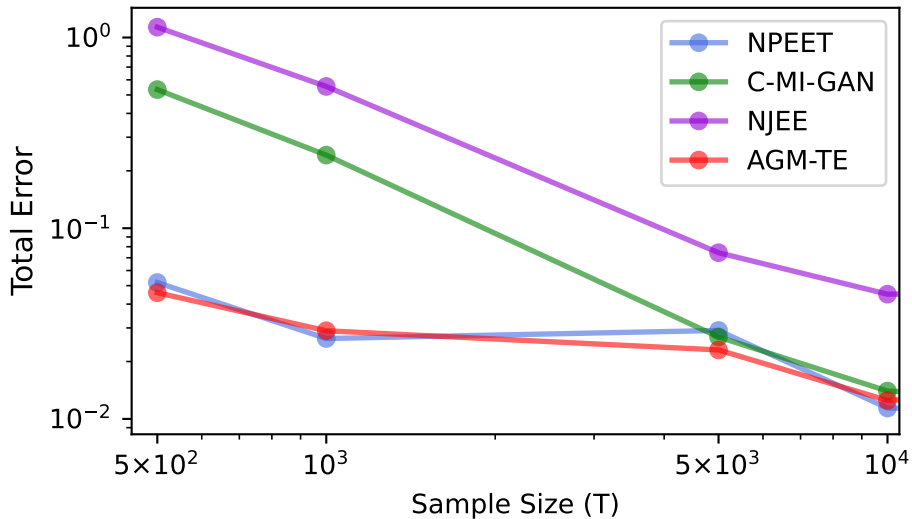

Supplement: supplementary_material [file attachment]

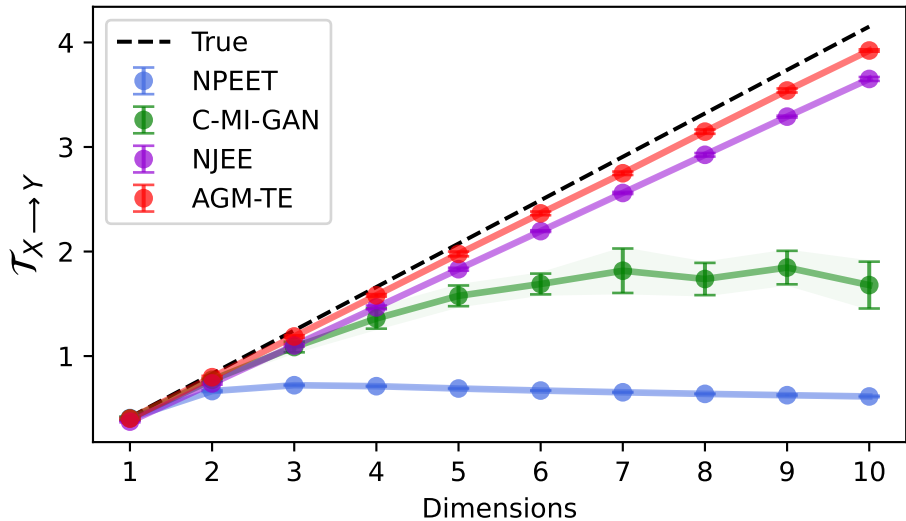

Supplement: supplementary_material [file attachment]

Linear Gaussian

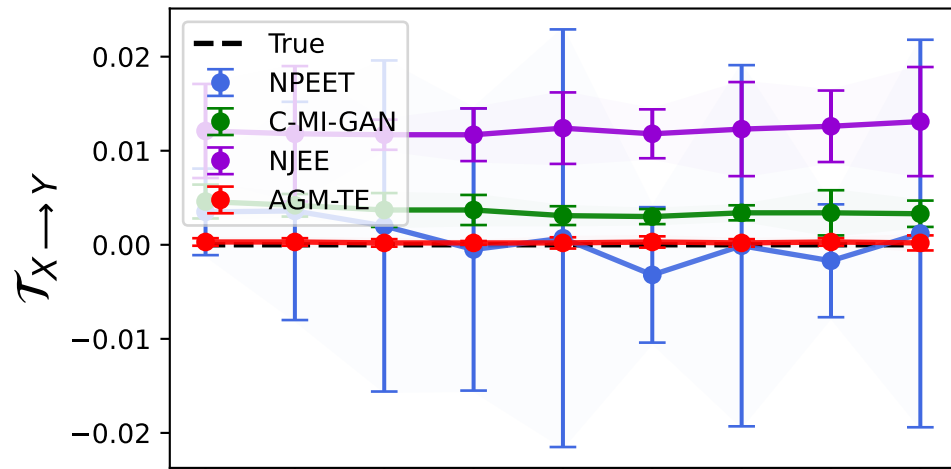

Joint Process

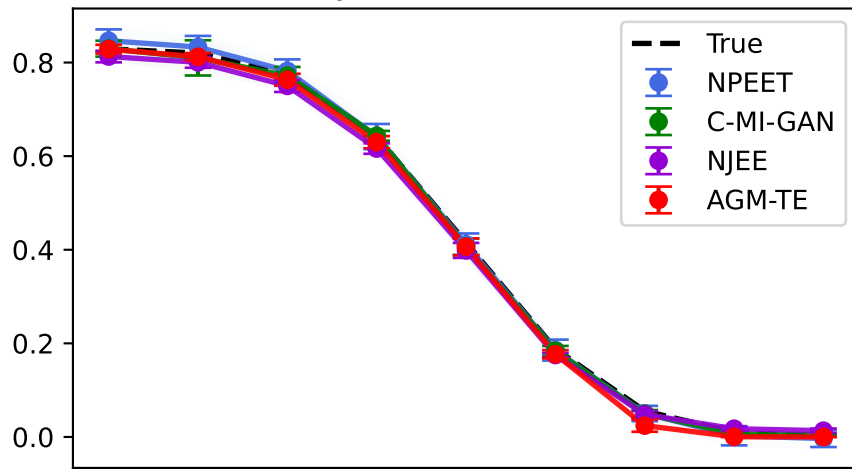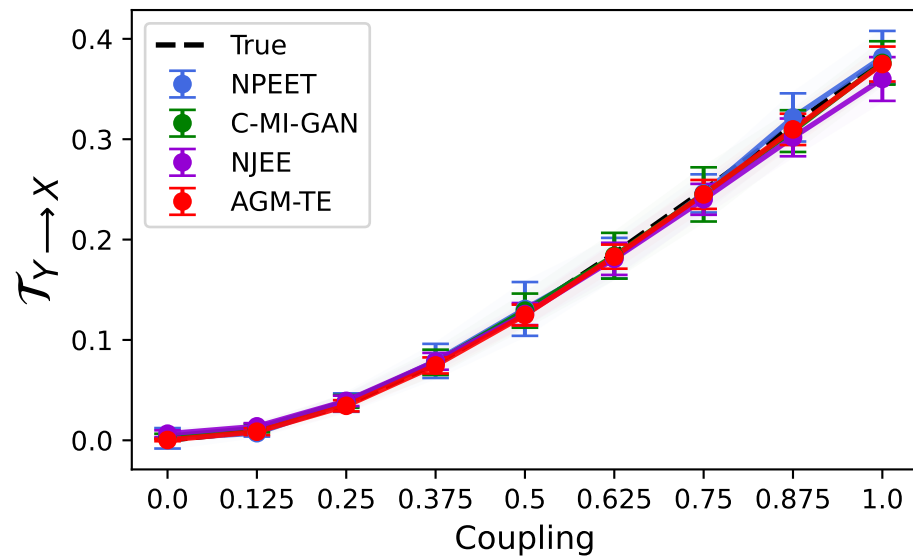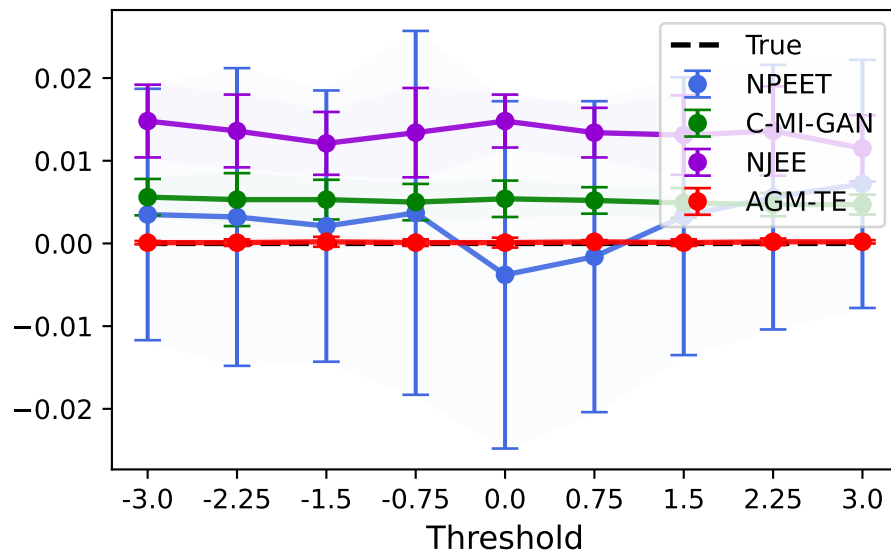

Supplement: supplementary_material [file attachment]

Linear Gaussian

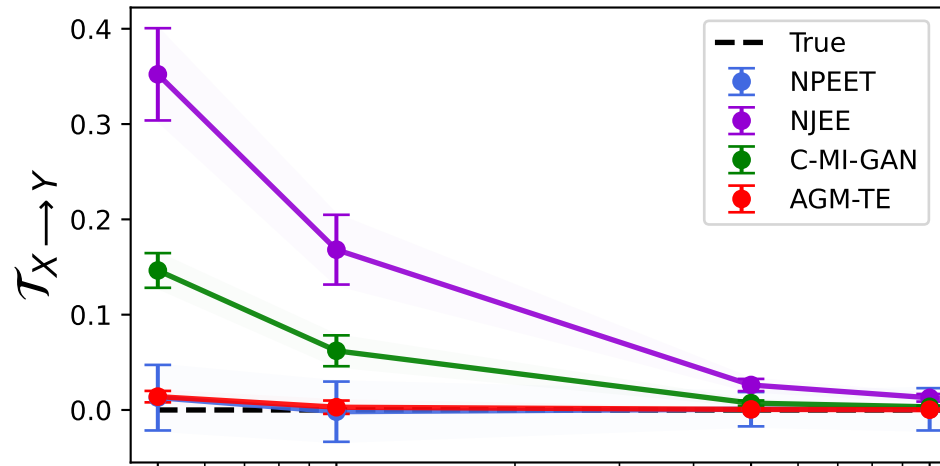

Joint Process

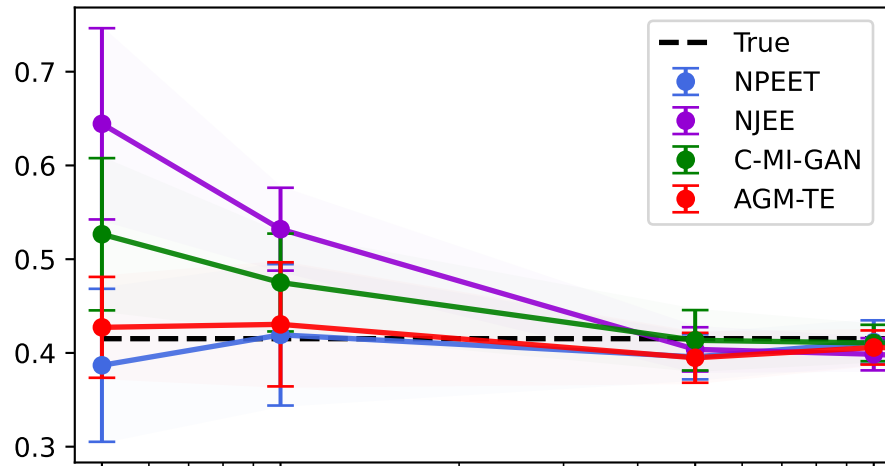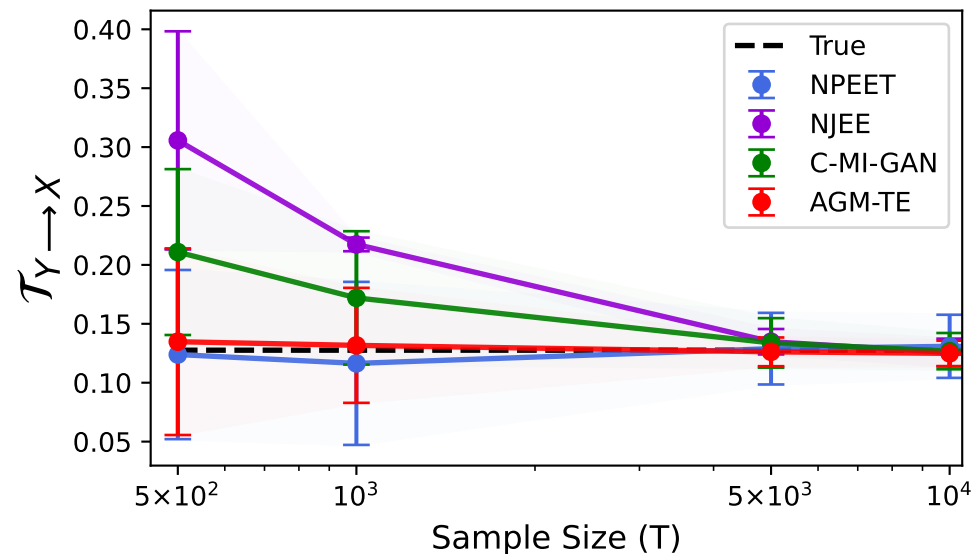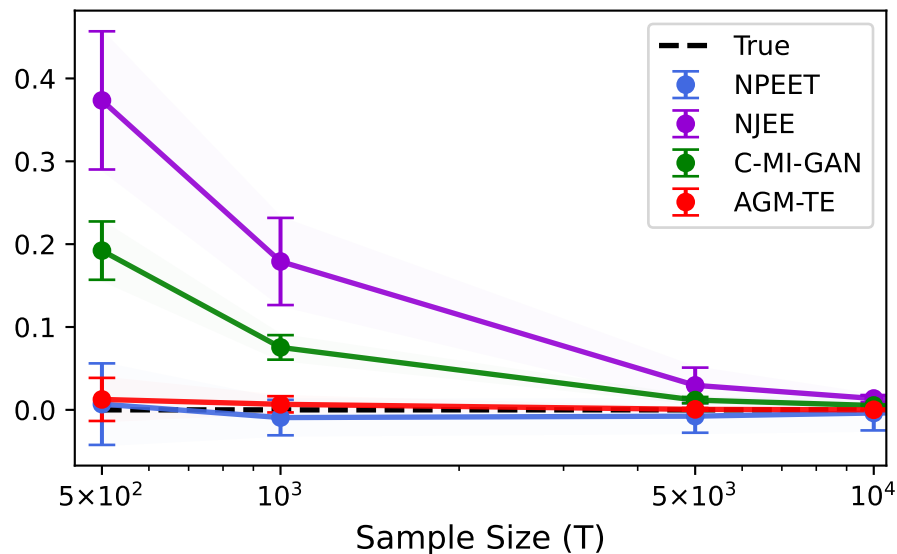

Supplement: supplementary_material [file attachment]

**A**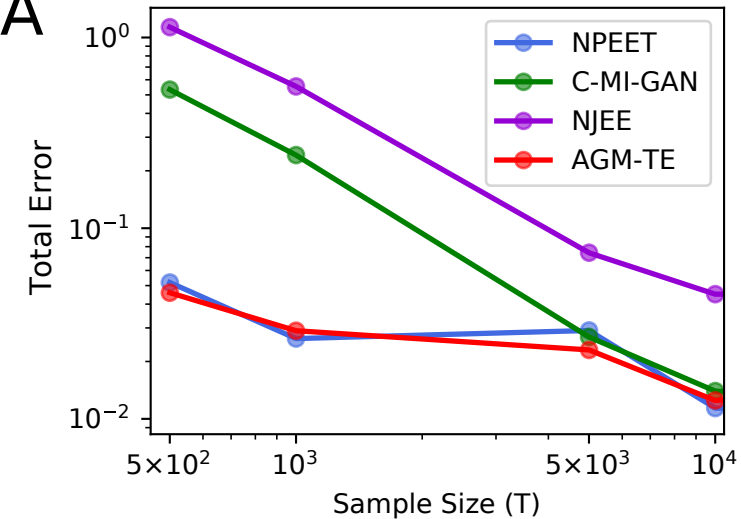**B**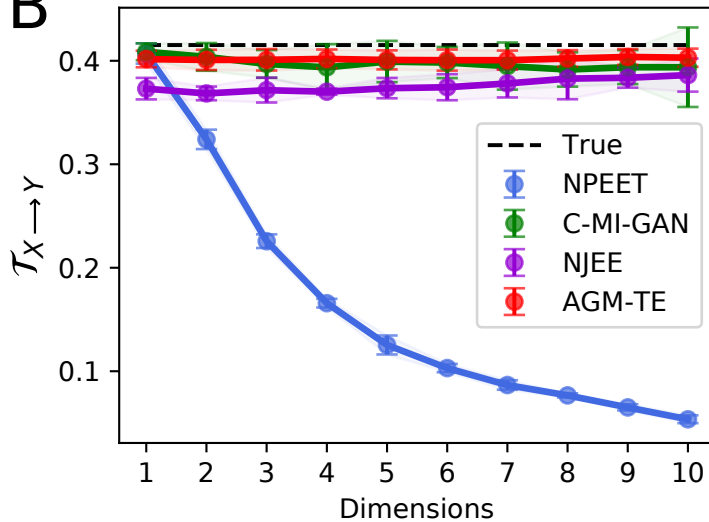**C**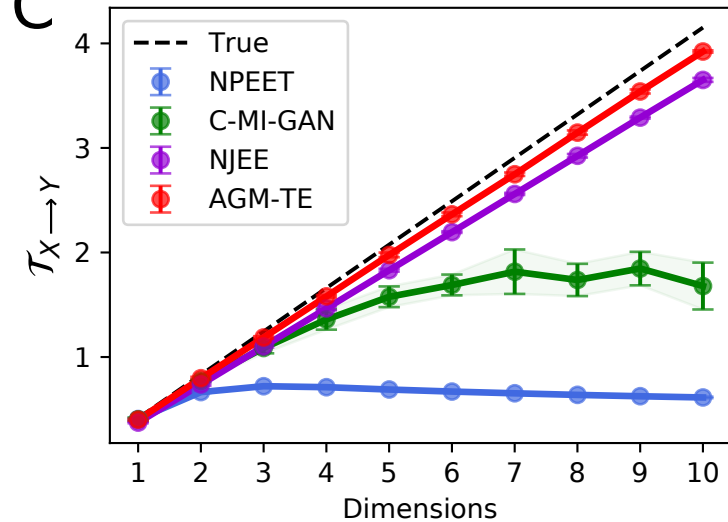

Supplement: supplementary_material [file attachment]
